# Supplementary material for: Higher stochasticity of microbiota composition in seedlings of domesticated wheat compared to wild wheat
Source: bioRxiv or medRxiv preprint supplement (doi:10.1101/685164), 2019-06-27
Supplement: Supplementary file [file media-1.pdf]

1 **Higher stochasticity of microbiota composition in seedlings of domesticated wheat**  
2 **compared to wild wheat**

3

4 Ezgi Özkurt, M. Amine Hassani, Uğur Sesiz, Sven Künzel, Tal Dagan, Hakan Özkan, Eva H.  
5 Stukenbrock

6

7

8 **Supplementary Methods**

9

10 **Origin of the wheat material**

11

12 Seed collections of *Triticum dicoccoides*, *Triticum boeoticum* and *Triticum urartu* were  
13 collected from different locations in South- East Turkey in previous years (2004, 2005, 2006)  
14 (Supp. Table 1). Seeds of *T. aestivum* from Turkey was collected by the farmer from a field in  
15 Kışlak, Antakya in 2017 (Supp. Table 1) and stored in a dry and cold room. We obtained these  
16 seeds in the same year from the farmer and we stored them at 4 °C until further usage.  
17 Seeds of *T. aestivum* from Germany (Benchmark cv.) were collected from the experimental  
18 farm of the Kiel University in Hohenschulen, Schleswig-Holstein in 2017. All the seeds in the  
19 collections were stored at 4 °C until further usage and processed all the seeds in the  
20 collections in 2018.

21

22

23 **Surface sterilization of seeds**

24 Seeds of *Triticum aestivum*, *Triticum dicoccoides*, *Triticum boeoticum* and *Triticum urartu*  
25 were washed with sterile miliQ water. Later, each seed was treated shortly with 0.1%  
26 TritonX and washed with water, then 80% EtOH and washed with water and lastly 1.2 %  
27 Sodium Hypochlorite (NaClO) and finally washed with water three times. Wash-off water  
28 from some seeds were kept and sequenced. Some seeds were immediately processed for  
29 DNA extraction while others were grown in sterile jars.

30

31

32

### 33 **Axenic propagation of leaves and roots**

34 After sterilization, seeds were directly transferred into the plant minimal medium (PNM). 1L  
35 of PNM medium is composed 1 mL of 500 mM Potassium Nitrate, 1mL of KH<sub>2</sub>PO<sub>4</sub> stock  
36 solution (5g/ 100mL), 1 mL of K<sub>2</sub>HPO<sub>4</sub> stock solution (2.5 g/100mL), 1mL of 2M Magnesium  
37 Sulfate (MgSO<sub>4</sub> X 7 H<sub>2</sub>O), 1 mL of 200 mM Calcium Nitrate, 2.5 mL of Fe-EDTA and 1mL of  
38 Sodium Chloride stock solution (2.5 g/100 mL). The pH of the solution was adjusted to 6.2  
39 and the medium was solidified by adding Gelrite. Finally, the medium was autoclaved at 121  
40 °C for 15 minutes. After autoclaving, 10 mL 1M filtered MES was added to the medium. The  
41 medium was transferred into sterile jars and after it was solidified, sterilized seeds were  
42 transferred into the medium. Seeds were germinated in sterile jars in a climate chamber  
43 (Percival plant growth chambers, CLF PlantClimatics GmbH, Wertingen, Germany). Light  
44 period of 16/8 hours, temperature 15 °C) for two weeks corresponding to the second leaf  
45 growth stage.

46

47

### 48 **DNA Extraction from seeds and seedling material**

49

50 We followed a similar method to the Phenol-Chloroform extraction method customized by  
51 Agler et al, 2016 (1). For DNA extractions, seed, leaf and root materials was processed as  
52 follows: Single seeds were transferred into 7mL tubes containing sterilized zirconium beads.  
53 Approximately six cm of leaves and six cm of multiple roots were used for DNA extraction.  
54 We crushed samples with Bertin Precellys Instrument (Bertin Instruments, Montigny-le-  
55 Bretonneux, France) pre-cooled with liquid nitrogen at 7500 rpm for 2 x 30 seconds with an  
56 in-between pause of 15 seconds. To the crushed samples, we added 0.6 mL of DNA  
57 extraction buffer (0.5% SDS, 50 mM TRIS buffer at pH 8, 200 mM NaCl, 2mM EDTA). Next, we  
58 added 50 µg/mL of Lysozyme and 10 µg/mL of Proteinase K and incubated the samples for  
59 45 min at 37°C. After incubation, samples were transferred into new tubes containing 0.1  
60 mm zirconium and 0.5mm glass beads and beat-treated using Bertin Precellys (Bertin  
61 Instruments, Montigny-le-Bretonneux, France) at 6500 rpm for 2 x 30 seconds with a 15

62 second pause. 10 µg/mL RNase was added to each sample before incubation at 37°C for 45  
63 minutes. We next centrifuged the samples at 13000 rpm for 2 minutes to remove beads and  
64 non-homogenized tissue. The nucleic acids were cleaned up with  
65 phenol/chloroform/isoamyl alcohol (25:24:1) for three times, and chloroform/isoamyl  
66 alcohol (24:1) one time, then precipitated by adding 1/10th of the sample volume of 3 M  
67 sodium acetate and 2.5x volume 100% ethanol. Samples were then centrifuged at 4°C at  
68 13000 rpm for 30 minutes. Afterwards, the pellet was washed with 70% ethanol. Finally,  
69 pellets were washed in 100 µL of sterile water and stored at -20 °C until further usage. DNA  
70 extracted from seeds was treated with 1:1 with 20% Chelex-100 for 30 minutes to remove  
71 potential PCR inhibitors. Harvested leaves and roots were processed with the PowerSoil DNA  
72 kit (Mo Bio Laboratories, Heidelberg, Germany) according to the manufacturer's instructions  
73 (See Material and Methods).

74

75

#### 76 **DNA library preparation**

77

78 We prepared libraries for replicates of individual seed as well as leaf and root samples,  
79 respectively. In addition, we included three negative controls of DNA extraction and three  
80 wash-off controls from the surface sterilization to the libraries.

81 PCR amplification was performed in two steps (Suppl. Table 1 and 2). For 16S, we used the  
82 interfering primer approach developed by Agler and co-workers for *Arabidopsis thaliana*  
83 (Suppl. Table 3). However, we modified the primers according to the wheat genome (2). In  
84 the first step, universal primers primers Bacteria V5/V6/V7: B799F/ B1192R and for fungi  
85 ITS1: ITS1F/ITS2 were used to amplify the targeted regions (Suppl Table 3). Interfering  
86 primers for the 16S region were added in this step. Triplicates of each reaction were  
87 performed for both first and second steps. First PCR was run for 15 and 20 cycles for 16S and  
88 ITS, respectively. After the first reactions, three replicates were combined. 10 µL of each PCR  
89 product was cleaned with 0.5 µL Antarctic phosphatase and 0.5 µL Exonuclease I in 1.22 µL  
90 Antarctic phosphatase buffer (New England Biolabs GMBH, Frankfurt, Germany) at 37 °C for  
91 30 minutes followed by 80 °C for 15 min. The product of the cleaned samples was used as a  
92 template for the second PCR in which unique barcodes for sequencing of 12bp length were

93 added as well. Second PCRs were run for 20 and 15 cycles for 16S and ITS, respectively  
 94 including in total 35 cycles for both 16S and ITS reactions.

95

96 **Table 1: PCR conditions for the V5-7 amplification**

97

|                                              |                                            |                           |            |                   |
|----------------------------------------------|--------------------------------------------|---------------------------|------------|-------------------|
| <b>V5-V7</b>                                 |                                            |                           |            |                   |
| <b><u>1st PCR:</u></b>                       |                                            | <b><u>1st PCR</u></b>     |            |                   |
|                                              |                                            | <b><u>conditions:</u></b> |            |                   |
| 10 µL                                        | Phusion Master Mix                         | 98°C                      | 30s        |                   |
| 1 µL                                         | Forward Primer                             | <b>98°C</b>               | <b>10s</b> |                   |
| 1 µL                                         | Reverse Primer                             | <b>55°C</b>               | <b>45s</b> | <b>X15 cycles</b> |
| 2 µL                                         | Interfering Forward Primer                 | <b>72°C</b>               | <b>30s</b> |                   |
| 2 µL                                         | Interfering Reverse Primer                 | 72°C                      | 5m         |                   |
| 0.5 µL                                       | DMSO                                       |                           |            |                   |
| 3 µL                                         | DNA                                        |                           |            |                   |
| 0.5 µL                                       | H2O                                        |                           |            |                   |
|                                              |                                            |                           |            |                   |
| Clean-up with ExoI and Antarctic Phosphatase | 10 µL of the 1st PCR product is cleaned-up | 37°C<br>80°C              | 30m<br>15m |                   |
|                                              |                                            |                           |            |                   |
| <b><u>2nd PCR:</u></b>                       |                                            | <b><u>2nd PCR</u></b>     |            |                   |
|                                              |                                            | <b><u>conditions:</u></b> |            |                   |
| 10 µL                                        | Phusion Master                             | 98°C                      | 30s        |                   |

|        |                            |             |     |                   |
|--------|----------------------------|-------------|-----|-------------------|
|        | Mix                        |             |     |                   |
| 1 µL   | Forward Primer             | <b>98°C</b> | 10s |                   |
| 1 µL   | Barcoded<br>Reverse Primer | <b>55°C</b> | 45s | <b>X20 cycles</b> |
| 0.5 µL | DMSO                       | <b>72°C</b> | 30s |                   |
| 3 µL   | Clean-up<br>product        | 72°C        | 5m  |                   |
| 4.5 µL | H2O                        |             |     |                   |

98

99

100

101 **Table2: PCR conditions for the ITS1-ITS2 amplification**

102

|                                    |                                    |                                                    |            |                   |
|------------------------------------|------------------------------------|----------------------------------------------------|------------|-------------------|
| <b>ITS1F-ITS2</b>                  |                                    |                                                    |            |                   |
| <b><u>1st PCR:</u></b>             |                                    | <b><u>1st PCR</u></b><br><b><u>conditions:</u></b> |            |                   |
| 10 µL                              | Phusion Master<br>Mix              | 98°C                                               | 30s        |                   |
| 1 µL                               | Forward Primer                     | <b>98°C</b>                                        | <b>10s</b> |                   |
| 1 µL                               | Reverse Primer                     | <b>55°C</b>                                        | <b>30s</b> | <b>X20 cycles</b> |
| 0.5 µL                             | DMSO                               | <b>72°C</b>                                        | <b>30s</b> |                   |
| 1 µL                               | DNA                                | 72°C                                               | 5m         |                   |
| 6.5 µL                             | H2O                                |                                                    |            |                   |
|                                    |                                    |                                                    |            |                   |
| Clean-up with<br>ExoI and Antartic | 10 µL of the 1st<br>PCR product is | 37°C<br>80°C                                       | 30m<br>15m |                   |

|                 |                         |                                |            |                   |
|-----------------|-------------------------|--------------------------------|------------|-------------------|
| Phosphatase     | cleaned-up              |                                |            |                   |
|                 |                         |                                |            |                   |
| <b>2nd PCR:</b> |                         | <b>2nd PCR<br/>conditions:</b> |            |                   |
| 10 µL           | Phusion Master Mix      | 98°C                           | 30s        |                   |
| 1 µL            | Forward Primer          | <b>98°C</b>                    | <b>10s</b> |                   |
| 1 µL            | Barcoded Reverse Primer | <b>55°C</b>                    | <b>30s</b> | <b>X15 cycles</b> |
| 0.5 µL          | DMSO                    | <b>72°C</b>                    | <b>30s</b> |                   |
| 1 µL            | Clean-up product        | 72°C                           | 5m         |                   |
| 6.5 µL          | H2O                     |                                |            |                   |

103

104 Finally, PCR products of ITS and 16S amplifications were sub-pooled in equal concentrations  
105 where the concentration of each sample was estimated using the software of gel visualizer  
106 (BIO RAD, Image Lab™ software 5.2.1). Subpools of 16S amplicons were run on the gel and  
107 bacterial DNA was cut out of the gel. DNA concentration of the subpools were quantified  
108 with Qubit. Then, we combined subpools in equal concentrations into final pools. Finally, we  
109 quantified the final concentration of the final pool with Qubit 3.0 Fluorometer (Thermo  
110 Fisher Scientific, Darmstadt, Germany).

111

112

### 113 **Amplicon Sequencing**

114 The final DNA pool spiked with 10% PhiX genomic DNA (Illumina, San Diego, CA)  
115 was used for MiSeq sequencing (Illumina, San Diego, CA) using the MiSeq Reagent Kit v3  
116 (Illumina, San Diego, CA). 0.5 µM of forward, reverse and index sequencing primers  
117 complementary to the linker/primer region of the concatenated primers were added

118 together (sequence of primers are available in Suppl Table 3). Paired-end sequencing was  
119 performed for 600 cycles for 301 bp amplicon size according to the Illumina instructions  
120 (<http://os.bioprotocol.org/attached/file/20171217/miseq%20denature%20dilute%20libraries%20guide%2015039740%2003.pdf>).  
121

122

123

124 **References:**

125 1. Agler MT, Mari A, Dombrowski N, Hacquard S. New insights in host-associated microbial  
126 diversity with broad and accurate taxonomic resolution. bioRxiv [Internet]. 2016;  
127 Available from: <https://www.biorxiv.org/content/early/2016/04/23/050005.abstract>

128 2. Zimin AV, Puiu D, Hall R, Kingan S, Clavijo BJ, Salzberg SL. The first near-complete  
129 assembly of the hexaploid bread wheat genome, *Triticum aestivum*. Gigascience. 2017  
130 Nov 1;6(11):1–7.

131

Table S1

| <b>Year</b> | <b>Location</b> | <b>Species</b>   | <b>Latitude</b> | <b>Longitude</b> |
|-------------|-----------------|------------------|-----------------|------------------|
| 2017        | Turkey, Kışlak  | Ta (non-treated) | 35° 58' 21.8"   | 36° 07' 41.8"    |
| 2017        | Germany         | Ta (benchmark)   | 54°18'50.9"     | 9°59'42.2"       |
| 2005        | West population | Tb               | 37° 19' 31"     | 37° 09' 28"      |
| 2006        | West population | Tb               | 36°54'29"       | 37°11'49"        |
| 2006        | West population | Td               | 37°20'19"       | 37°16'50"        |
| 2006        | West population | Td               | 37°19'50"       | 37°18'51"        |
| 2004        | East population | Td               | 37°50'40"       | 39°47'58"        |
| 2004        | East population | Tu               | 37°50'40"       | 39°47'58"        |
| 2004        | East population | Td               | 37°47'31"       | 39°57'18"        |



Table S2

|                                   | <b># of samples</b> | <b>Total # of reads</b> | <b>Average # of reads</b> | <b># of OTUs (b.r.)</b> | <b># of OTUs (a.r.)</b> |
|-----------------------------------|---------------------|-------------------------|---------------------------|-------------------------|-------------------------|
| <b>Seeds- bacteria</b>            | 58                  | 2356761                 | 40633.81                  | 1441                    | 1157                    |
| <b>Seeds-fungi</b>                | 30                  | 2621026                 | 87367.53                  | 272                     | 124                     |
| <b>Axenic leaves- bacteria</b>    | 16                  | 633975                  | 84526.0                   | 760                     | 589                     |
| <b>Axenic leaves- fungi</b>       | 15                  | 719618                  | 47974.53                  | 119                     | 98                      |
| <b>Axenic roots- bacteria</b>     | 16                  | 663813                  | 41488.31                  | 828                     | 632                     |
| <b>Axenic roots- fungi</b>        | 16                  | 2309064                 | 144316.5                  | 113                     | 74                      |
| <b>Leaves- bacteria</b>           | 42                  | 2460327                 | 58579.21                  | 3864                    | 3676                    |
| <b>Roots- bacteria</b>            | 39                  | 1690934                 | 43357.28                  | 3184                    | 3100                    |
| <b>Roots-fungi</b>                | 42                  | 1545621                 | 36800.5                   | 3757                    | 3737                    |
| <b>Natural soil- bacteria</b>     | 3                   | 100190                  | 33396.67                  | 1258                    | 1248                    |
| <b>Agricultural soil-bacteria</b> | 3                   | 82333                   | 27444.33                  | 1270                    | 1266                    |

Table S3

16S, ITS universal and interfering primers

|                                                     |
|-----------------------------------------------------|
| Universal_Primer- PCR1                              |
| <u>Bacteria - V5/V6/V7</u>                          |
| 799F: AACMGGATTAGATACCKG                            |
| 1192R: ACGTCATCCCCACCTTC                            |
|                                                     |
| <u>Fungi ITS 1- PCR1</u>                            |
| ITS1F: CTTGGTCATTTAGAGGAAGTAA                       |
| ITS2: GCTGCGTTCTTCATCGATGC                          |
|                                                     |
| <u>Interfering Primers: Mitochondria - V5/V6/V7</u> |
| Forward Primer: GGATCAGGGGCCAGCTAACGCGTGAAACA       |
| Reverse Primer: CGGAGCGGGCGCGTACTATTACCACTACG       |

Bacteria 16S, ITS PCR2 primers

B5-F: AATGATACGGCGACCACCGAGATCTACACGACTGCGACTGGCGAACMGGATTAGATACCCCKG

B5-R:

CAAGCAGAAGACGGCATAACGAGATXXXXXXXXXXXXCAGCCATTTAGTGTCACGTCATCCCCACCTTCC

Fungi, XXXXXXXXXXXX: 12bp barcode sequence

ITS-F: AATGATACGGCGACCACCGAGATCTACACTCACGCGCAGGCTTGGTCATTTAGAGGAAGTAA

ITS-R:

CAAGCAGAAGACGGCATAACGAGATXXXXXXXXXXXXCGTACTGTGGAGAGCTGCGTTCTTCATCGATGC

16S, ITS sequencing primers

B5-R1

ACGACTGCGACTGGCGAACMGGATTAGATACCC

B5-R2

CAGCCATTTAGTGTCACGTCATCCCCACCTTCC

B5-R3

GGAAGGTGGGGATGACGTGACACTAAATGGCTG

ITS-R1

TCACGCGCAGGCTTGGTCATTTAGAGGAAGTAA

ITS-R2

CGTACTGTGGAGAGCTGCGTTCTTCATCGATGC

ITS-R3

GCATCGATGAAGAACGCAGCTCTCCACAGTACG

**A**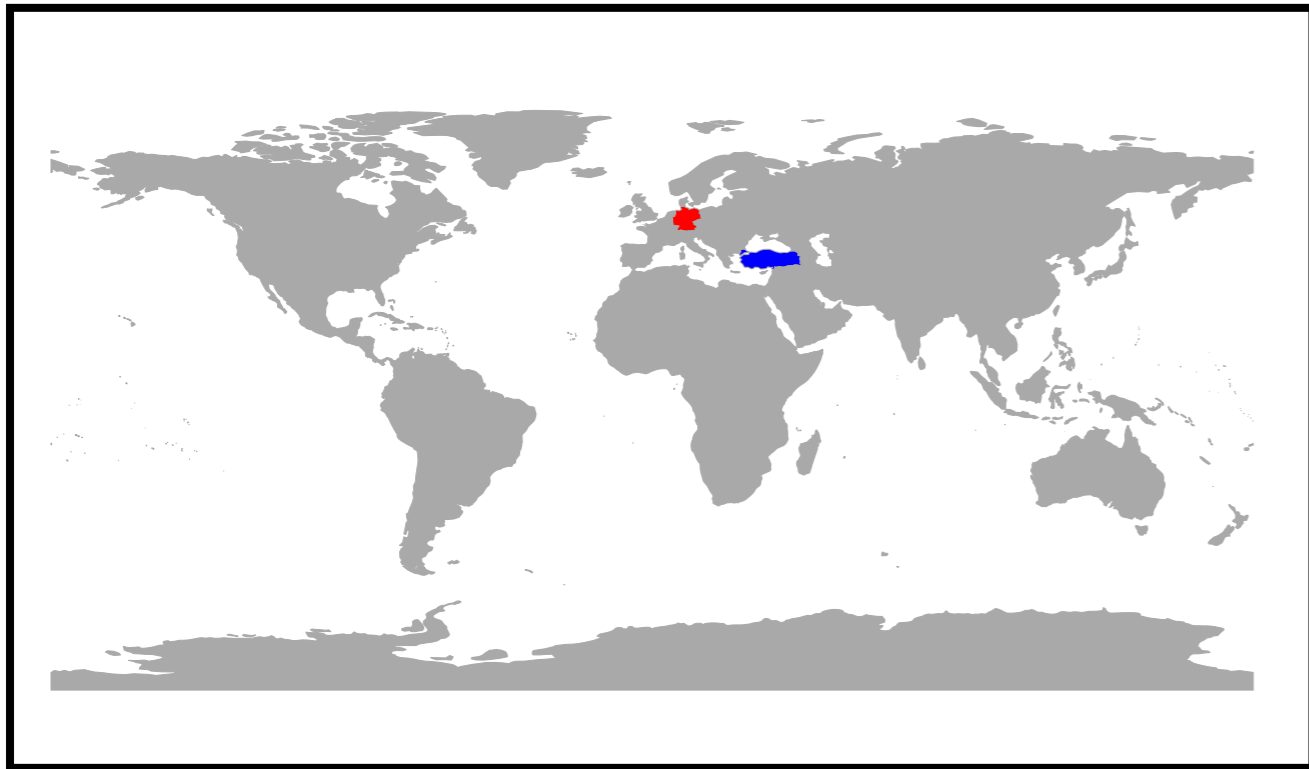**B**

Suppl Fig 1

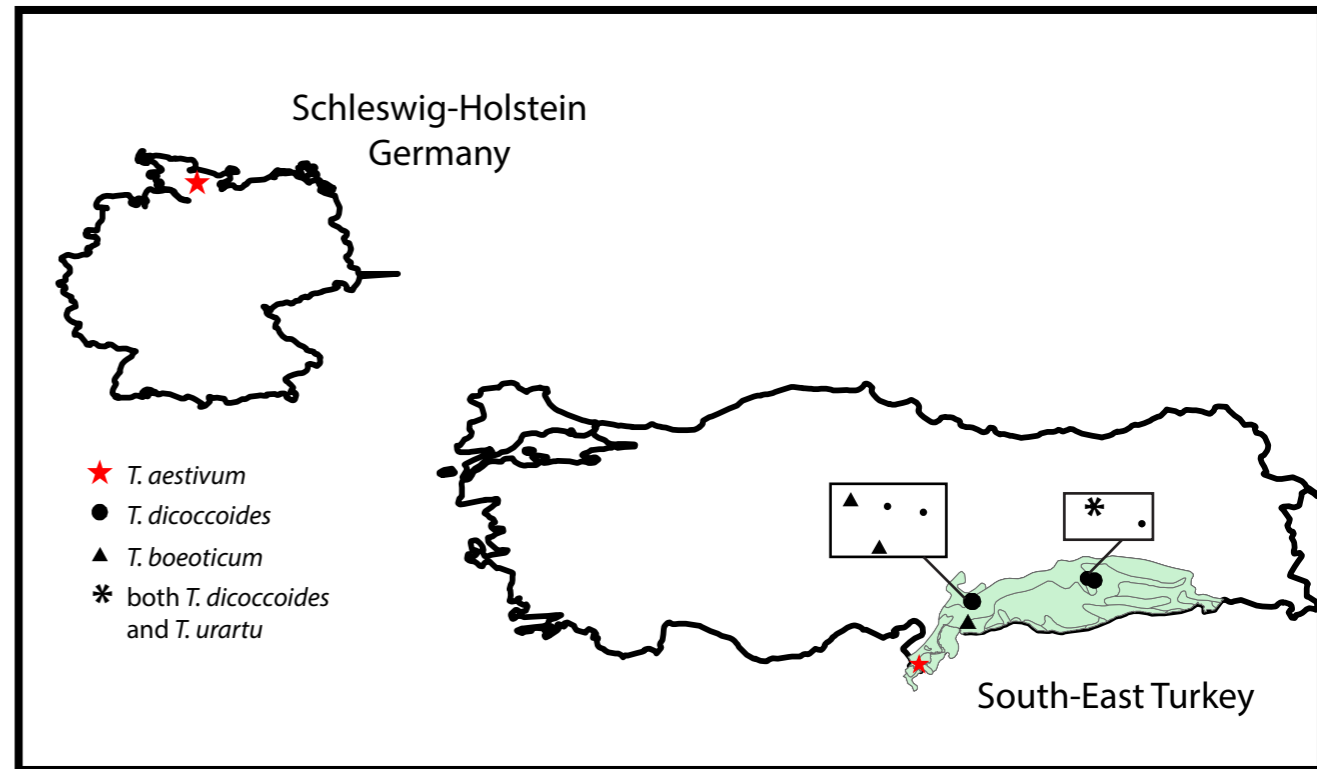

**A**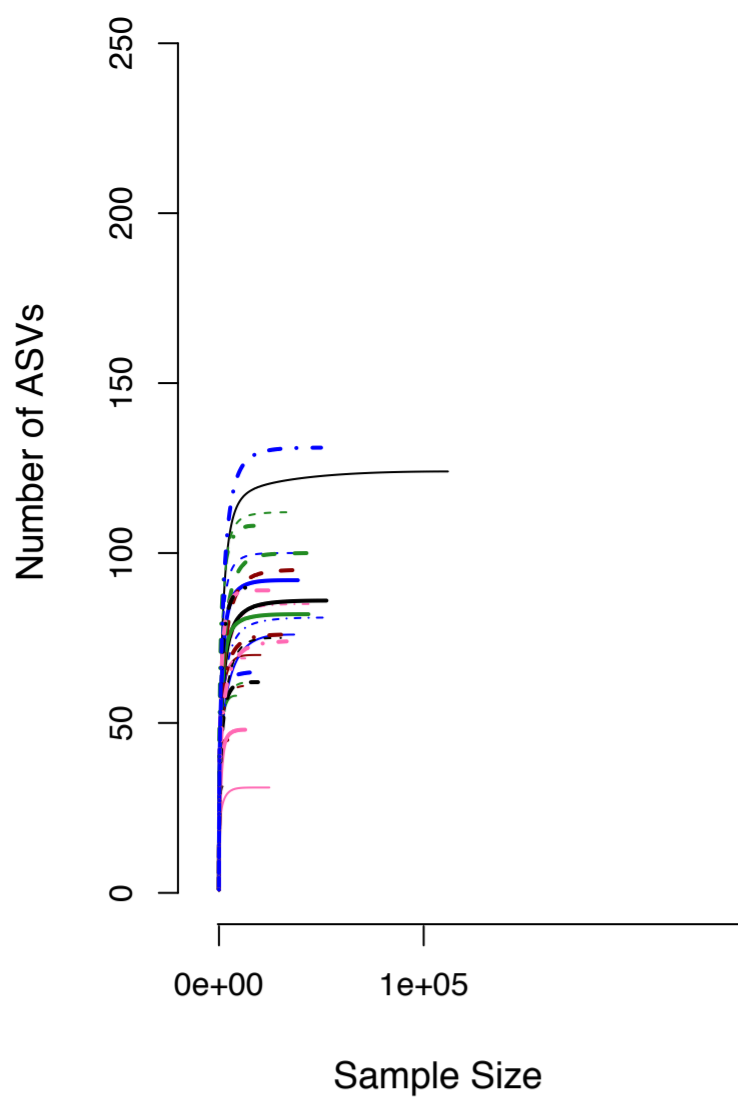**B**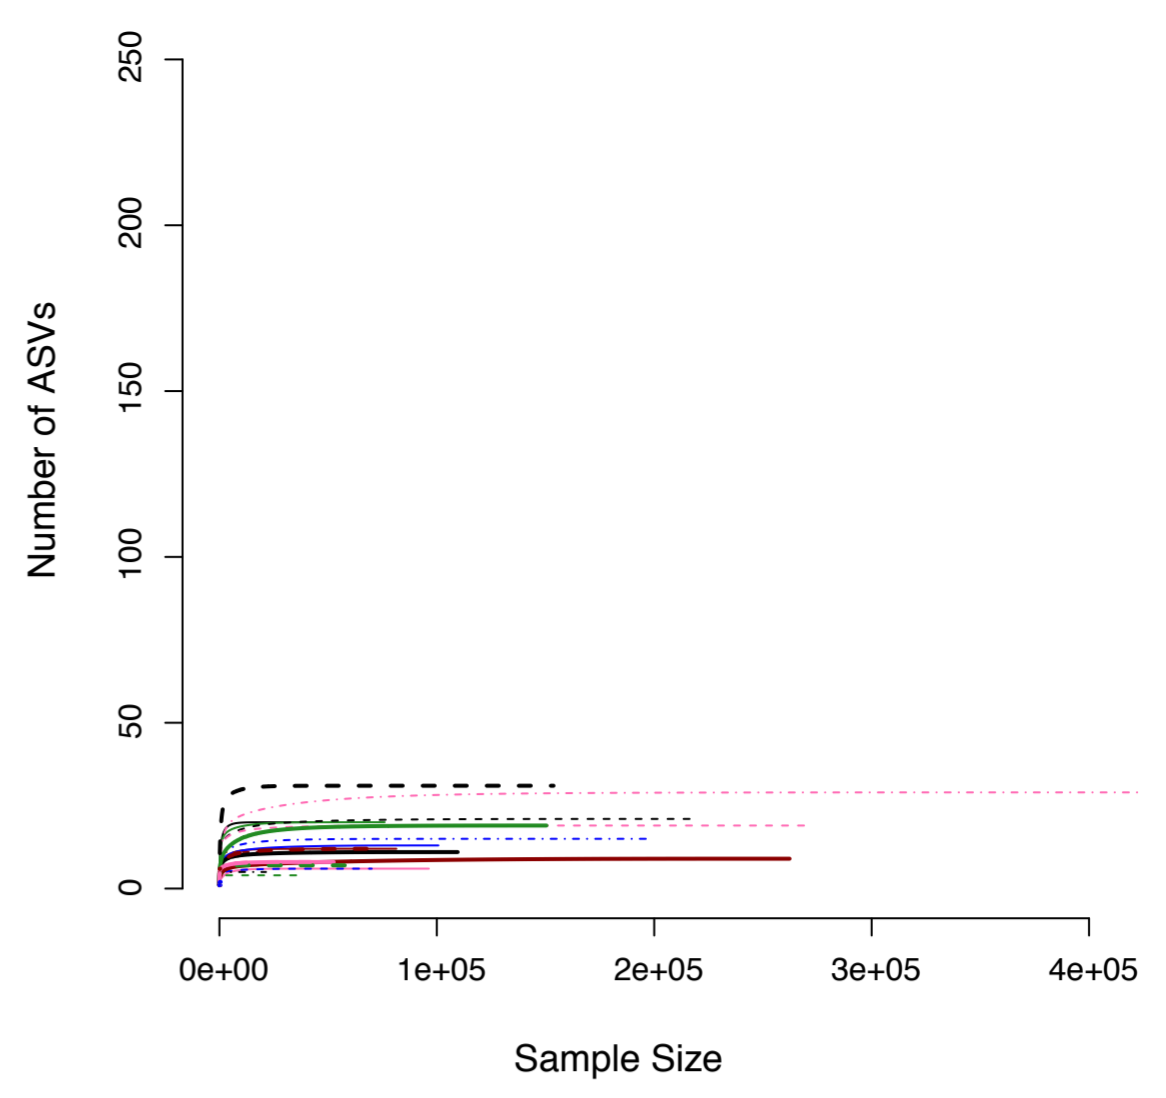**C**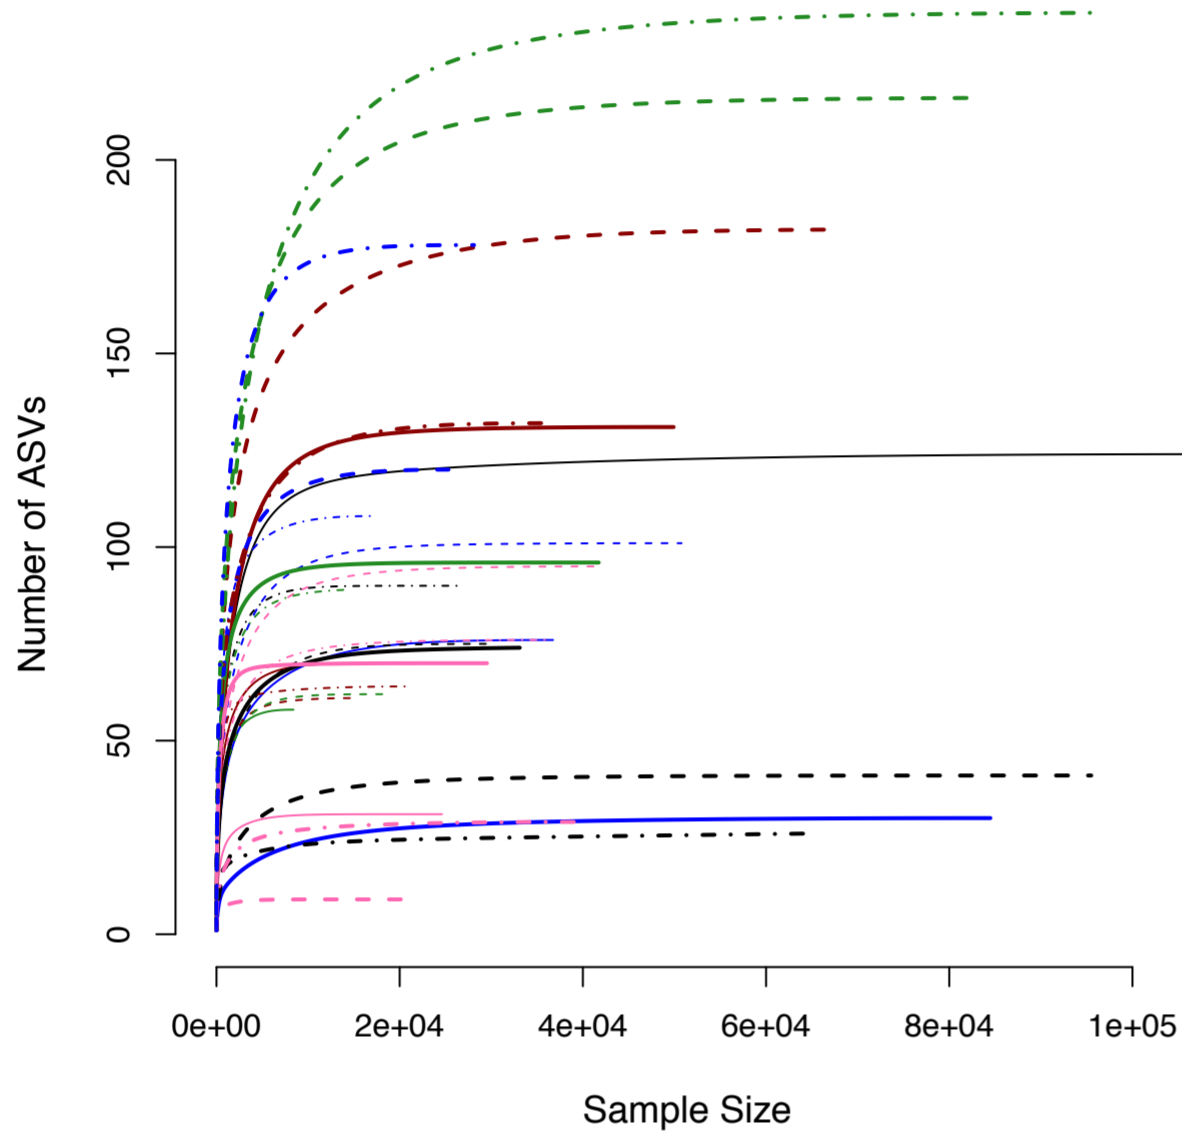**D**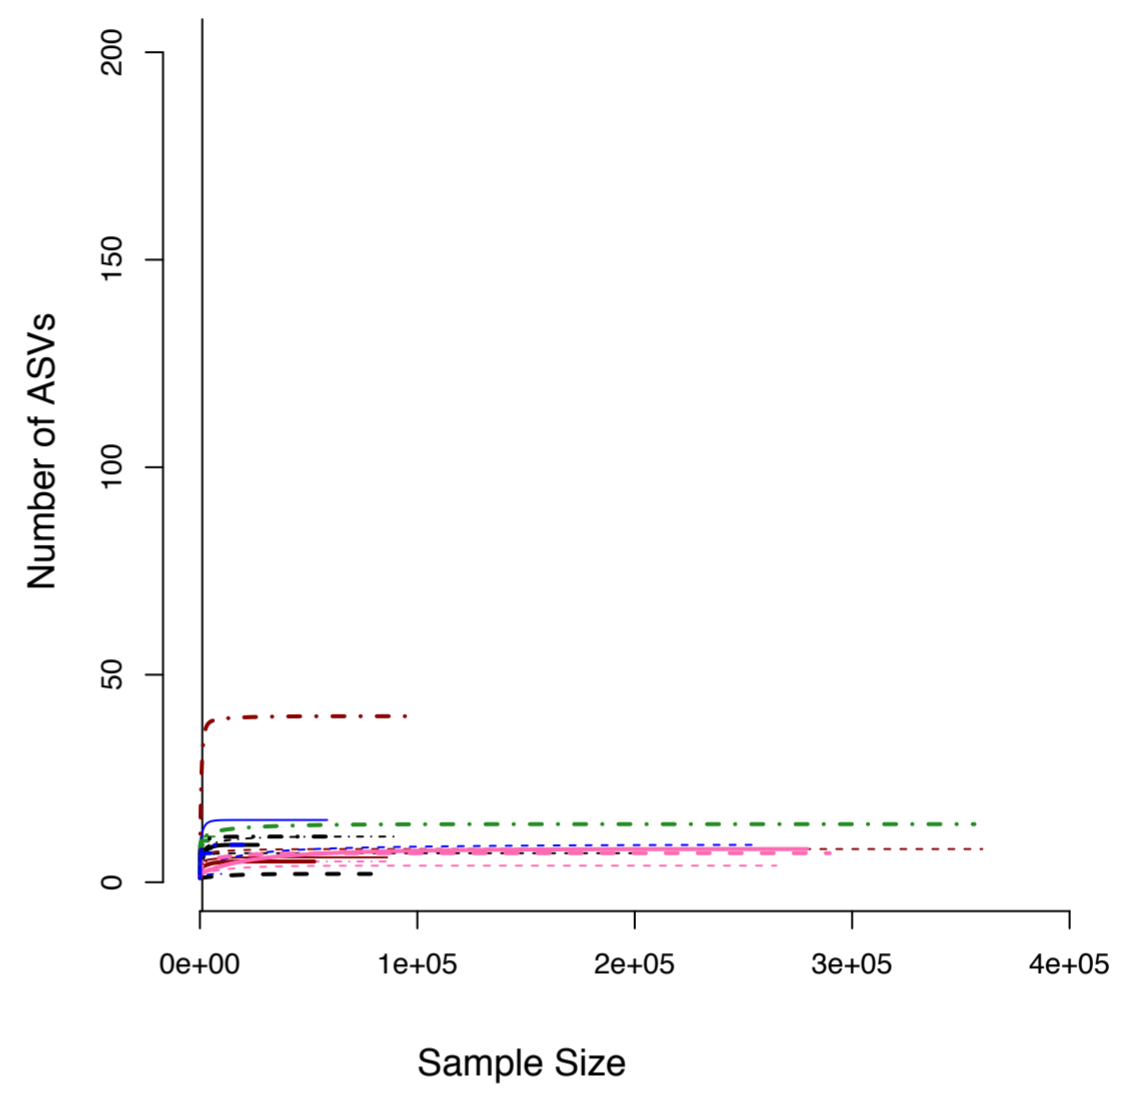**E**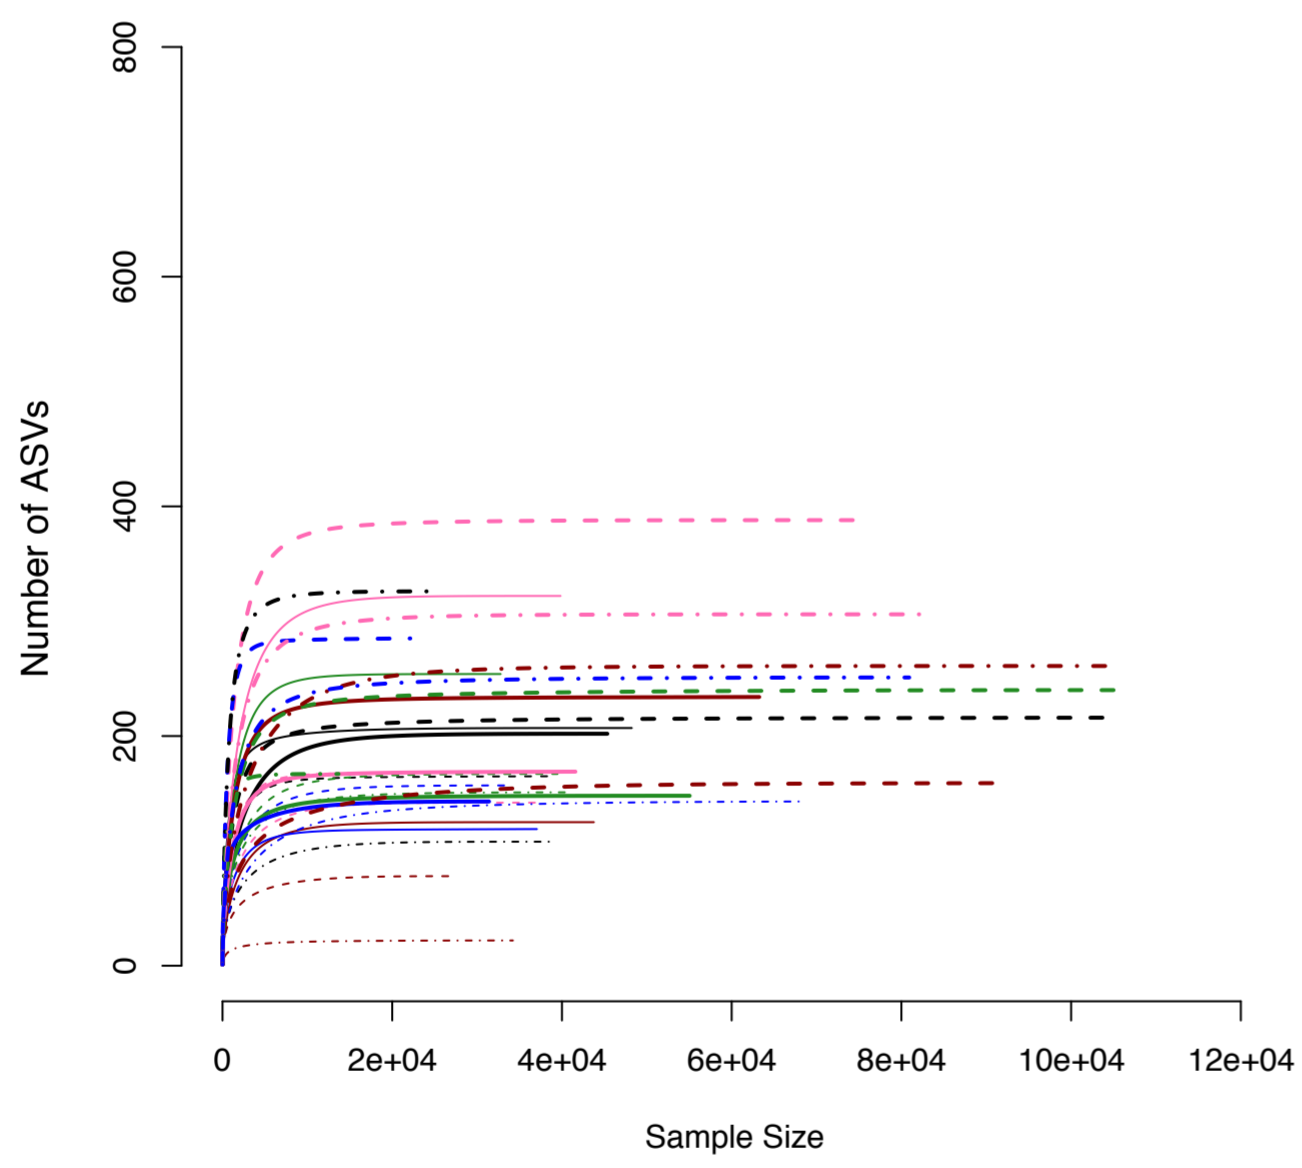**F**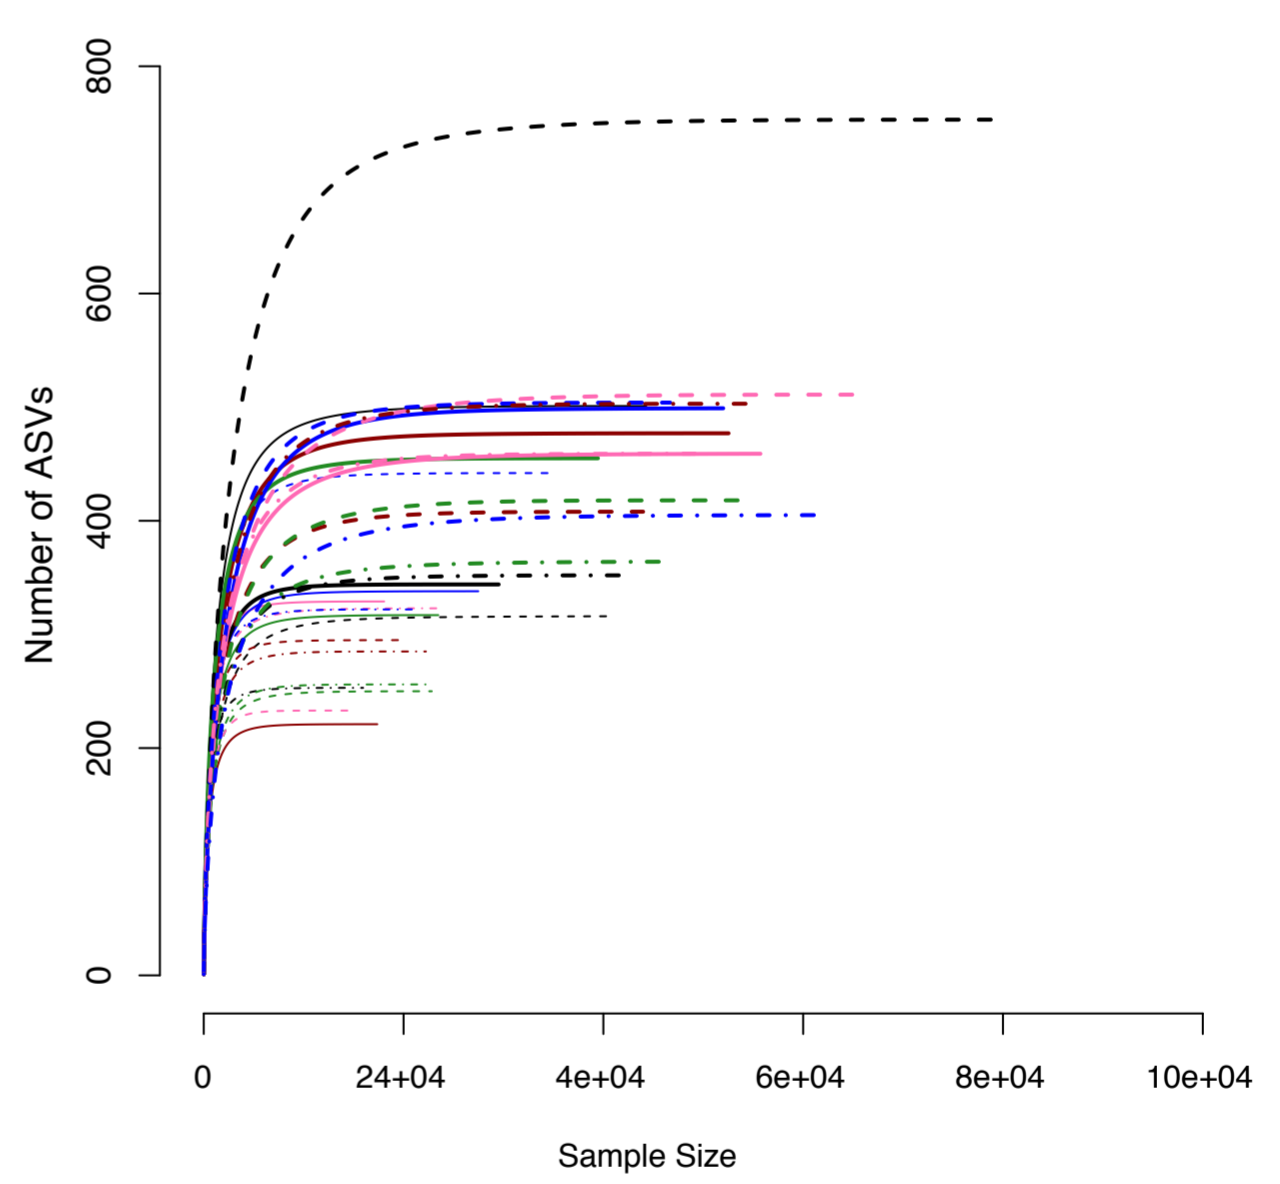**G**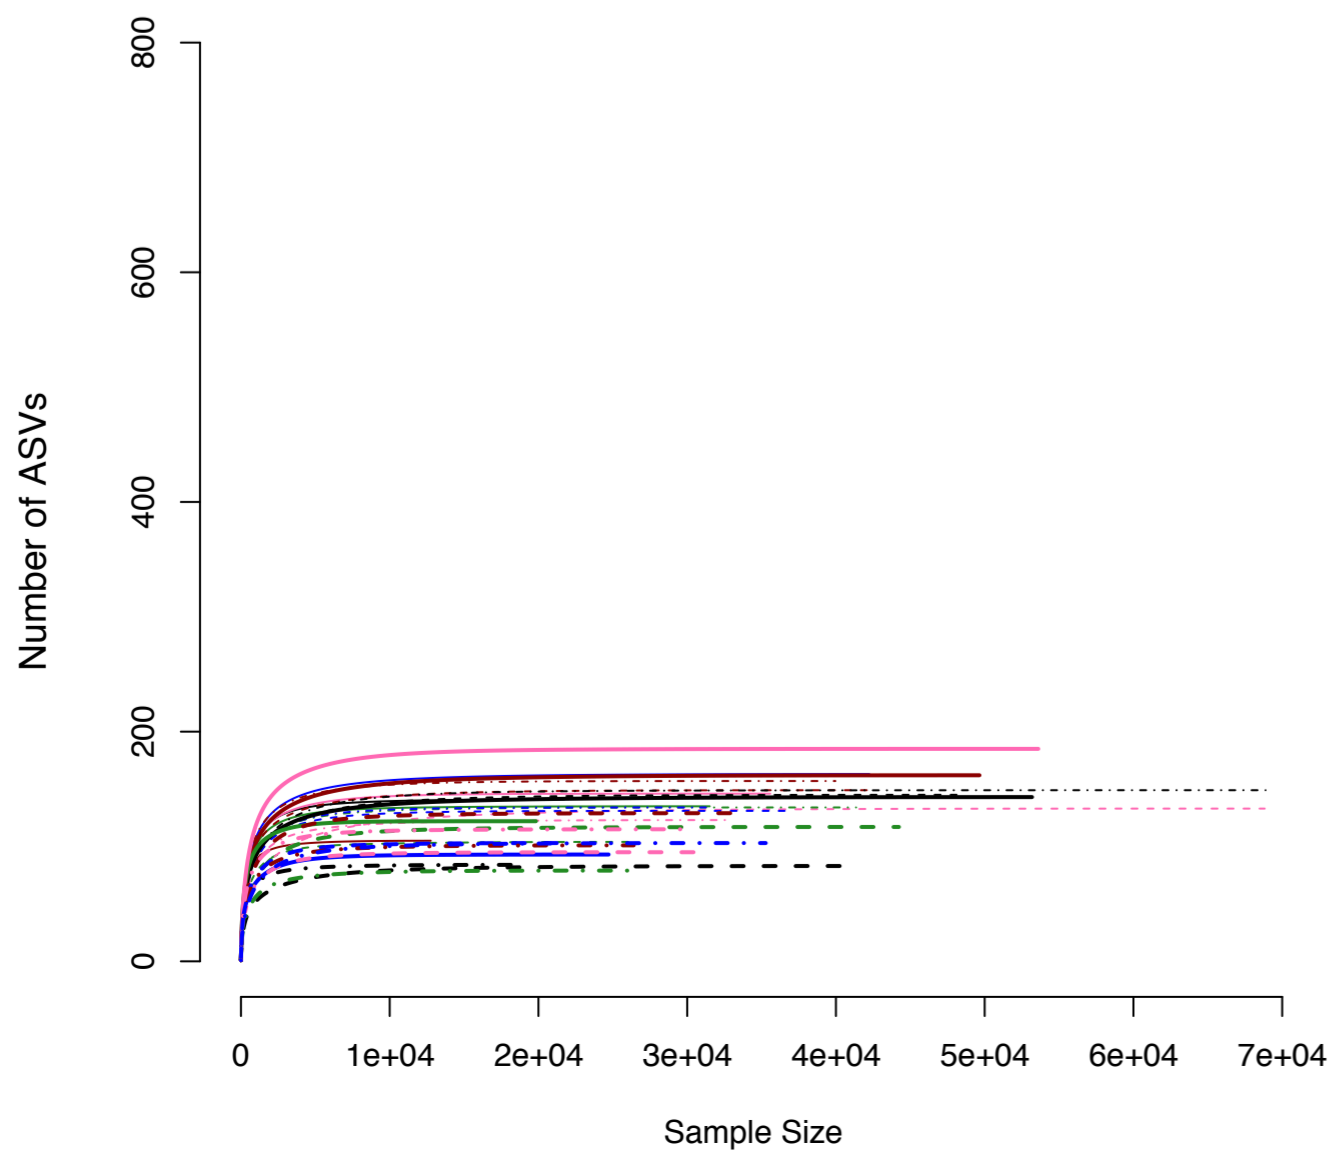

**A**

Suppl. Fig 3

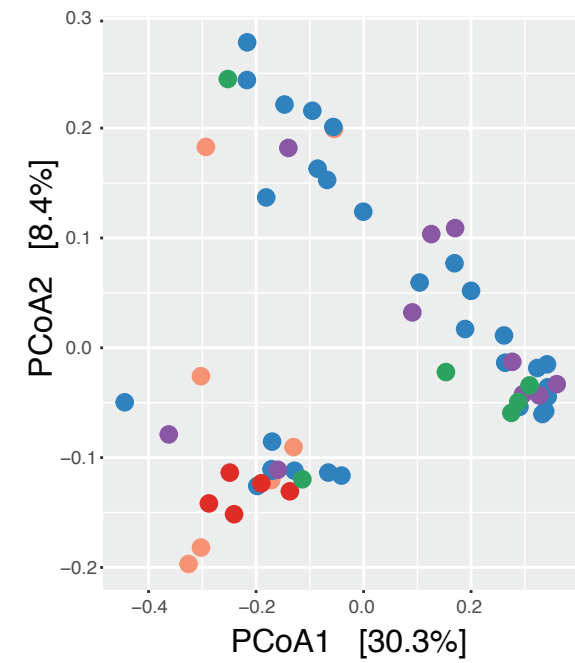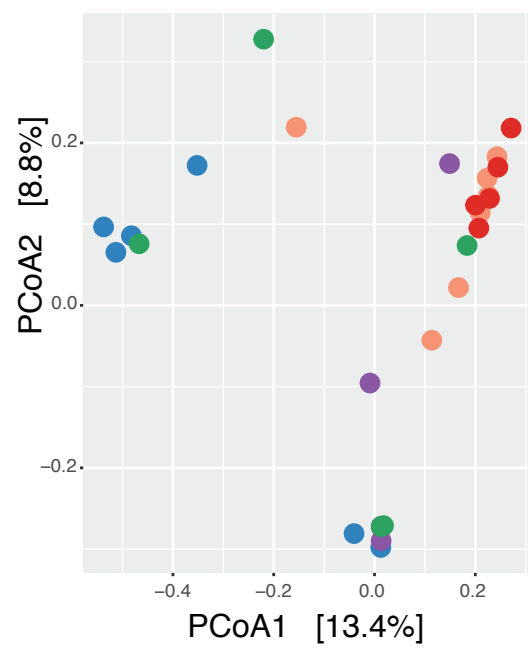

Host Species

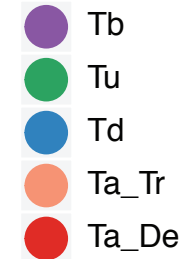

Tissues

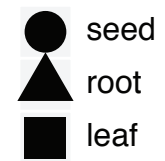**B**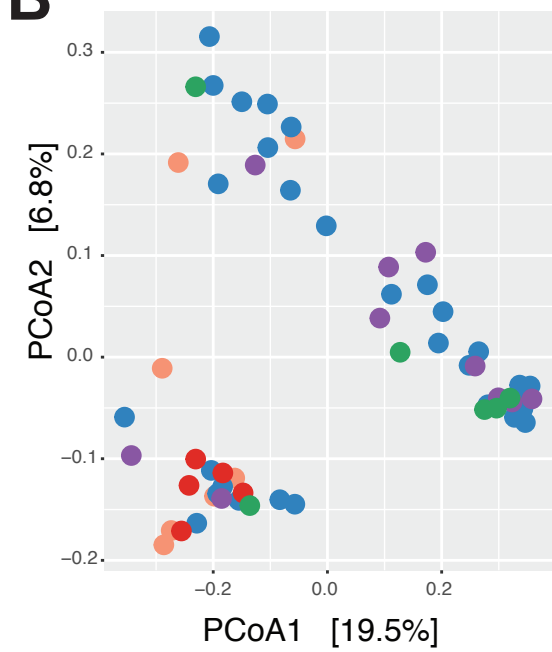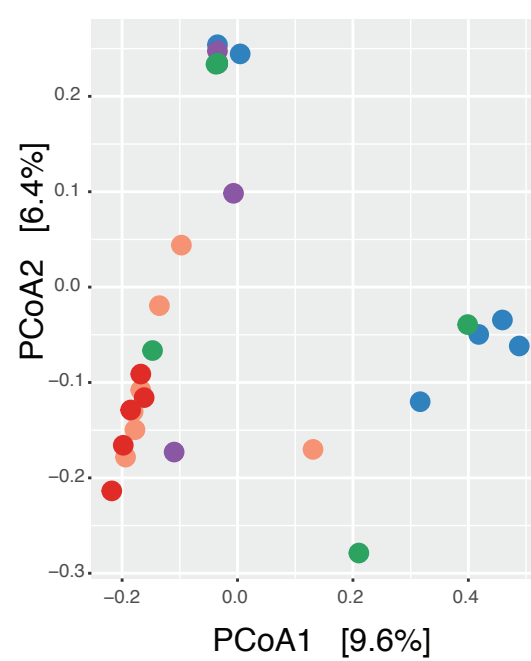**C**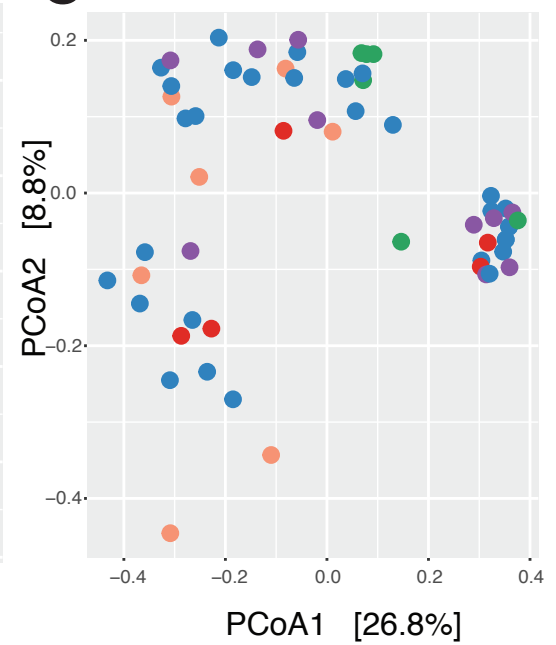**D**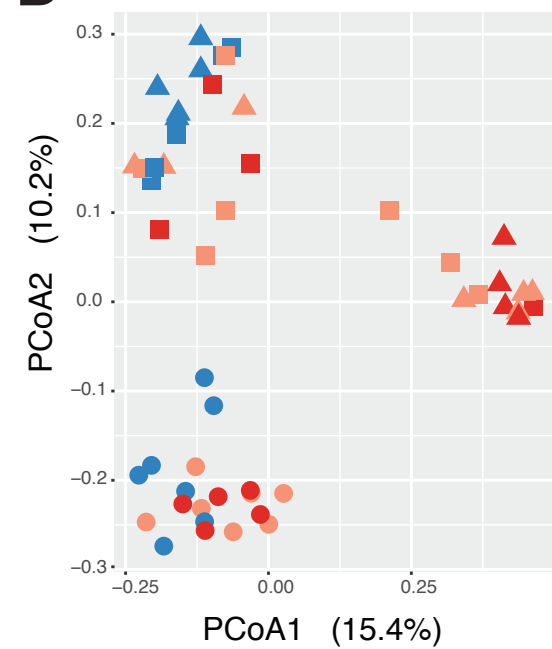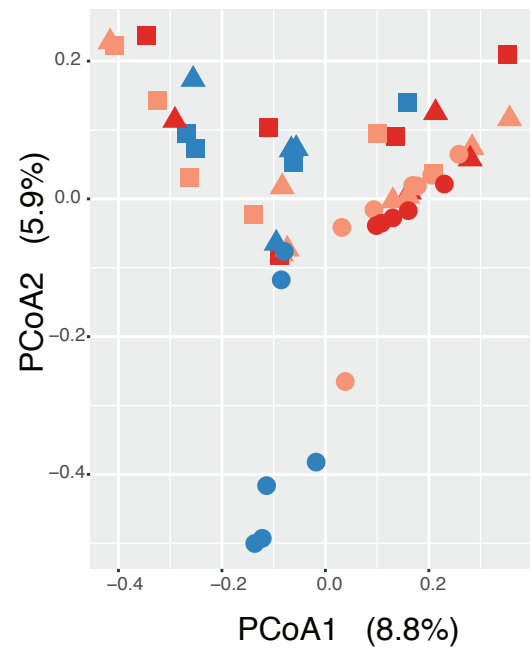**E**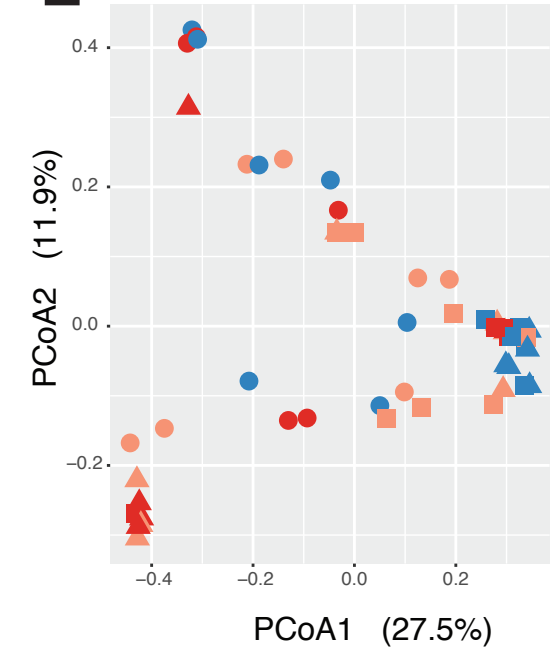

Distance Metric = Bray-Curtis

Suppl Fig 4

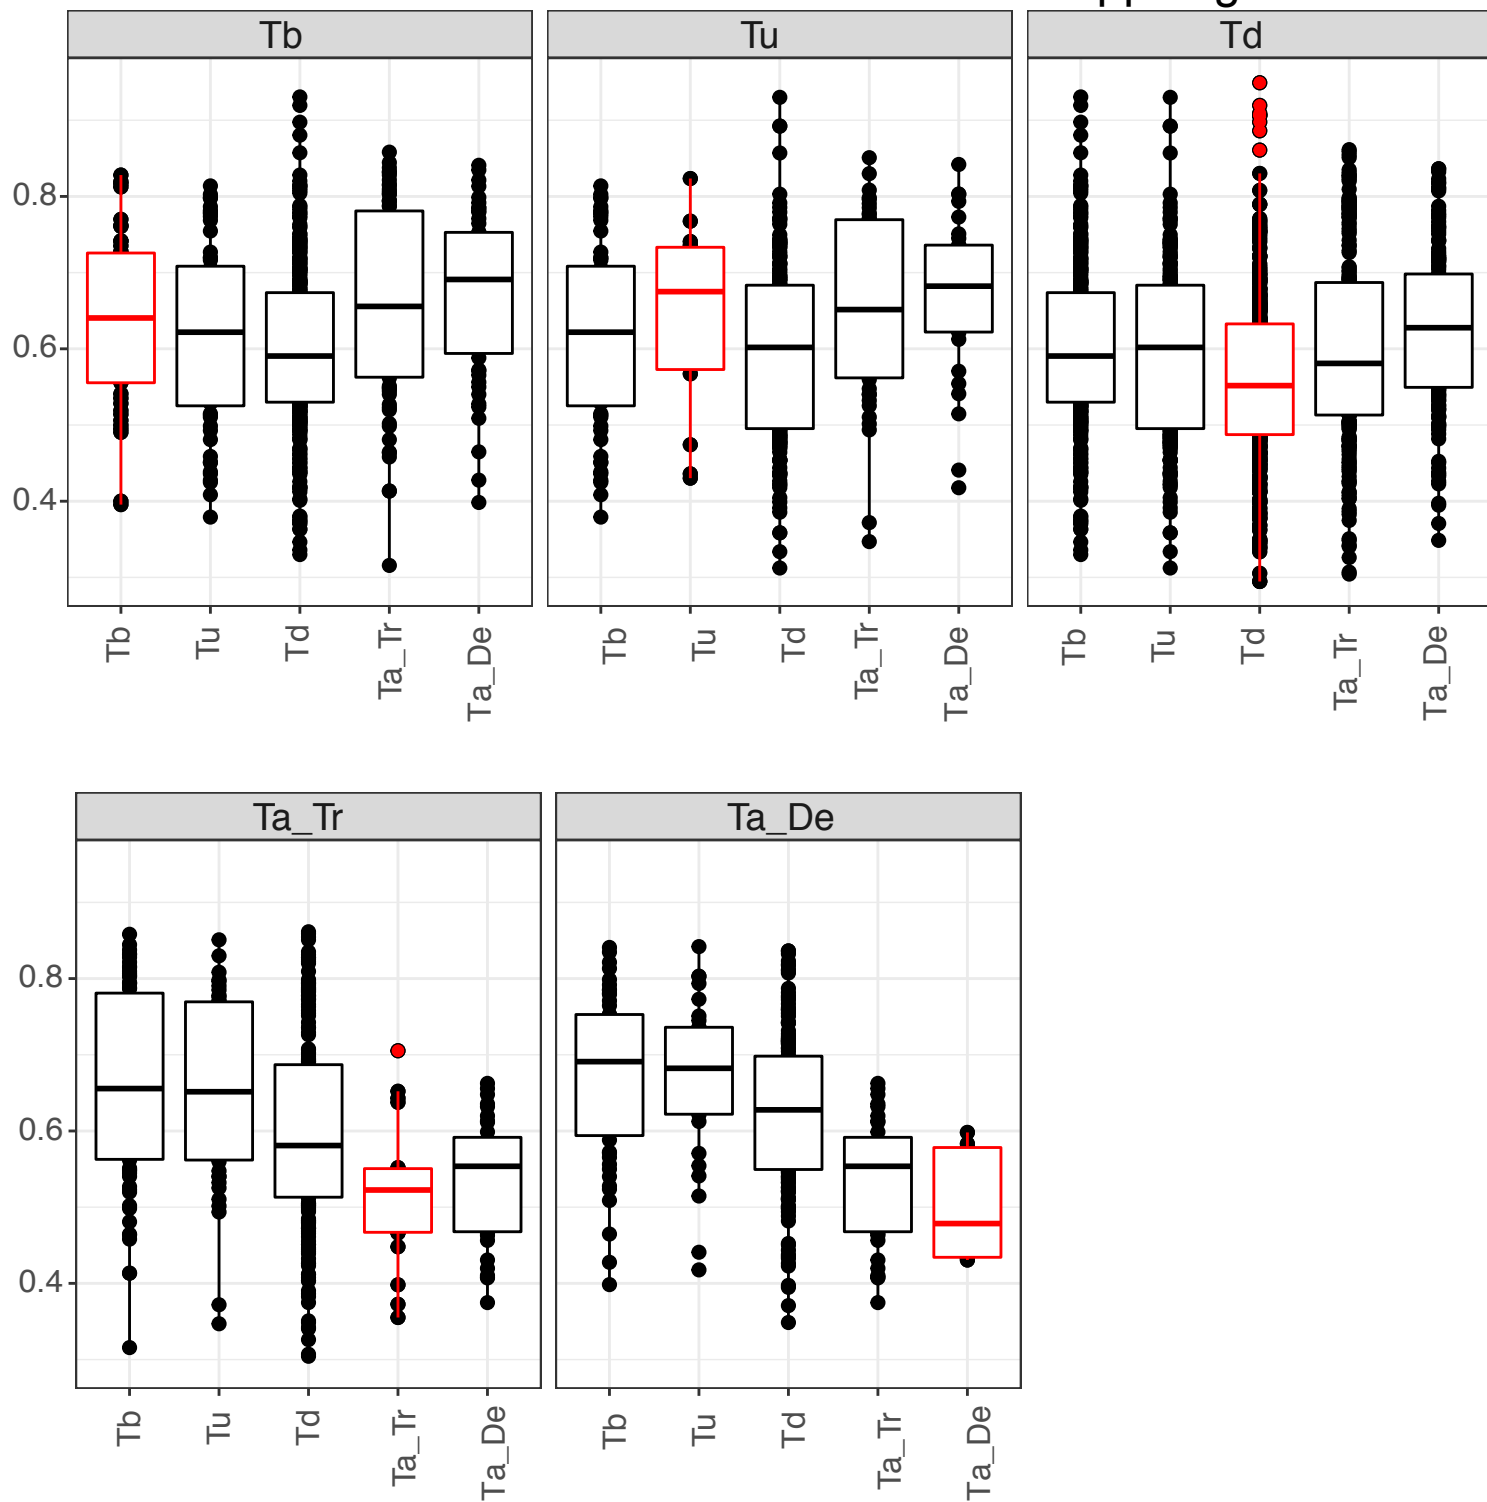



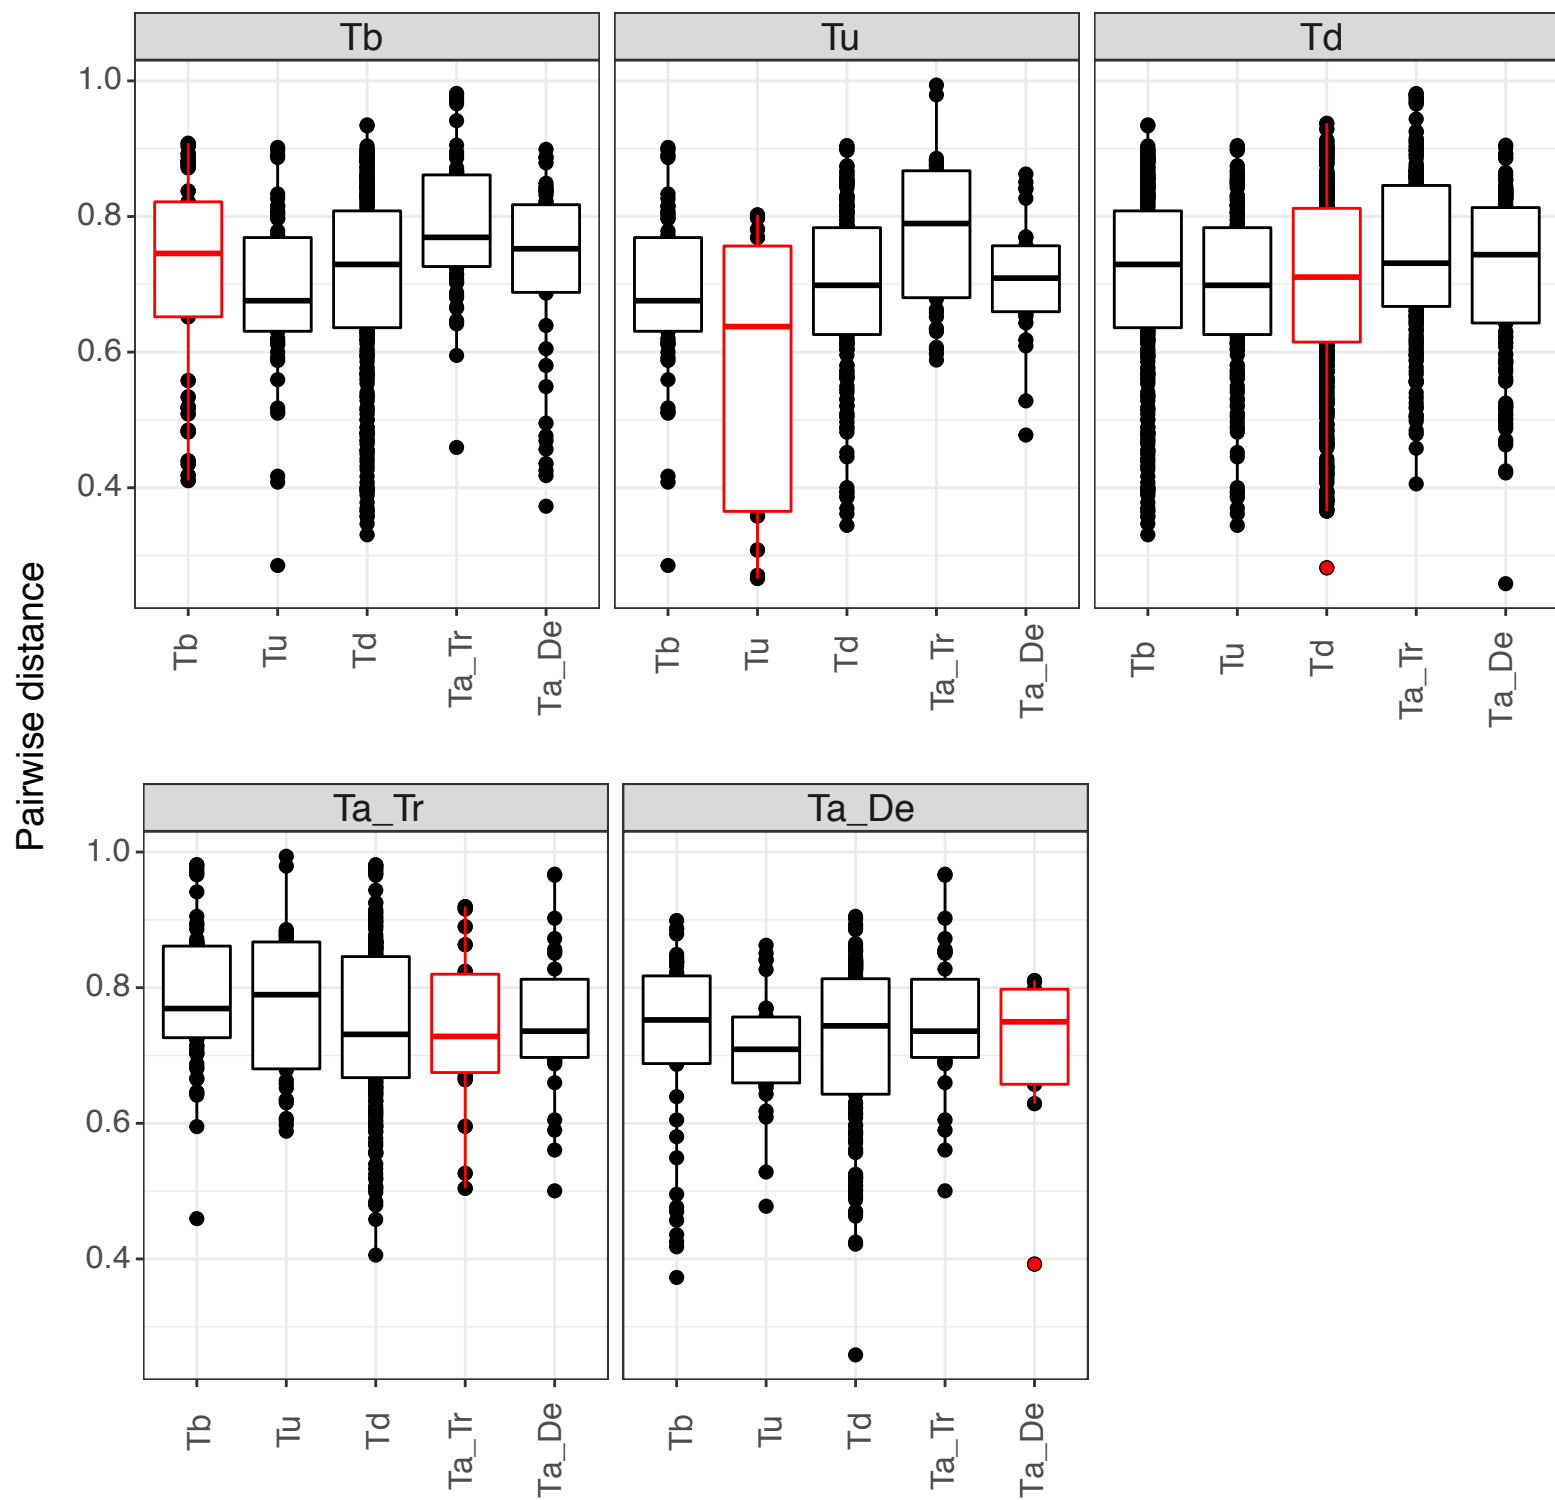

Distance Metric = Bray-Curtis

Suppl Fig 6

Pairwise distance

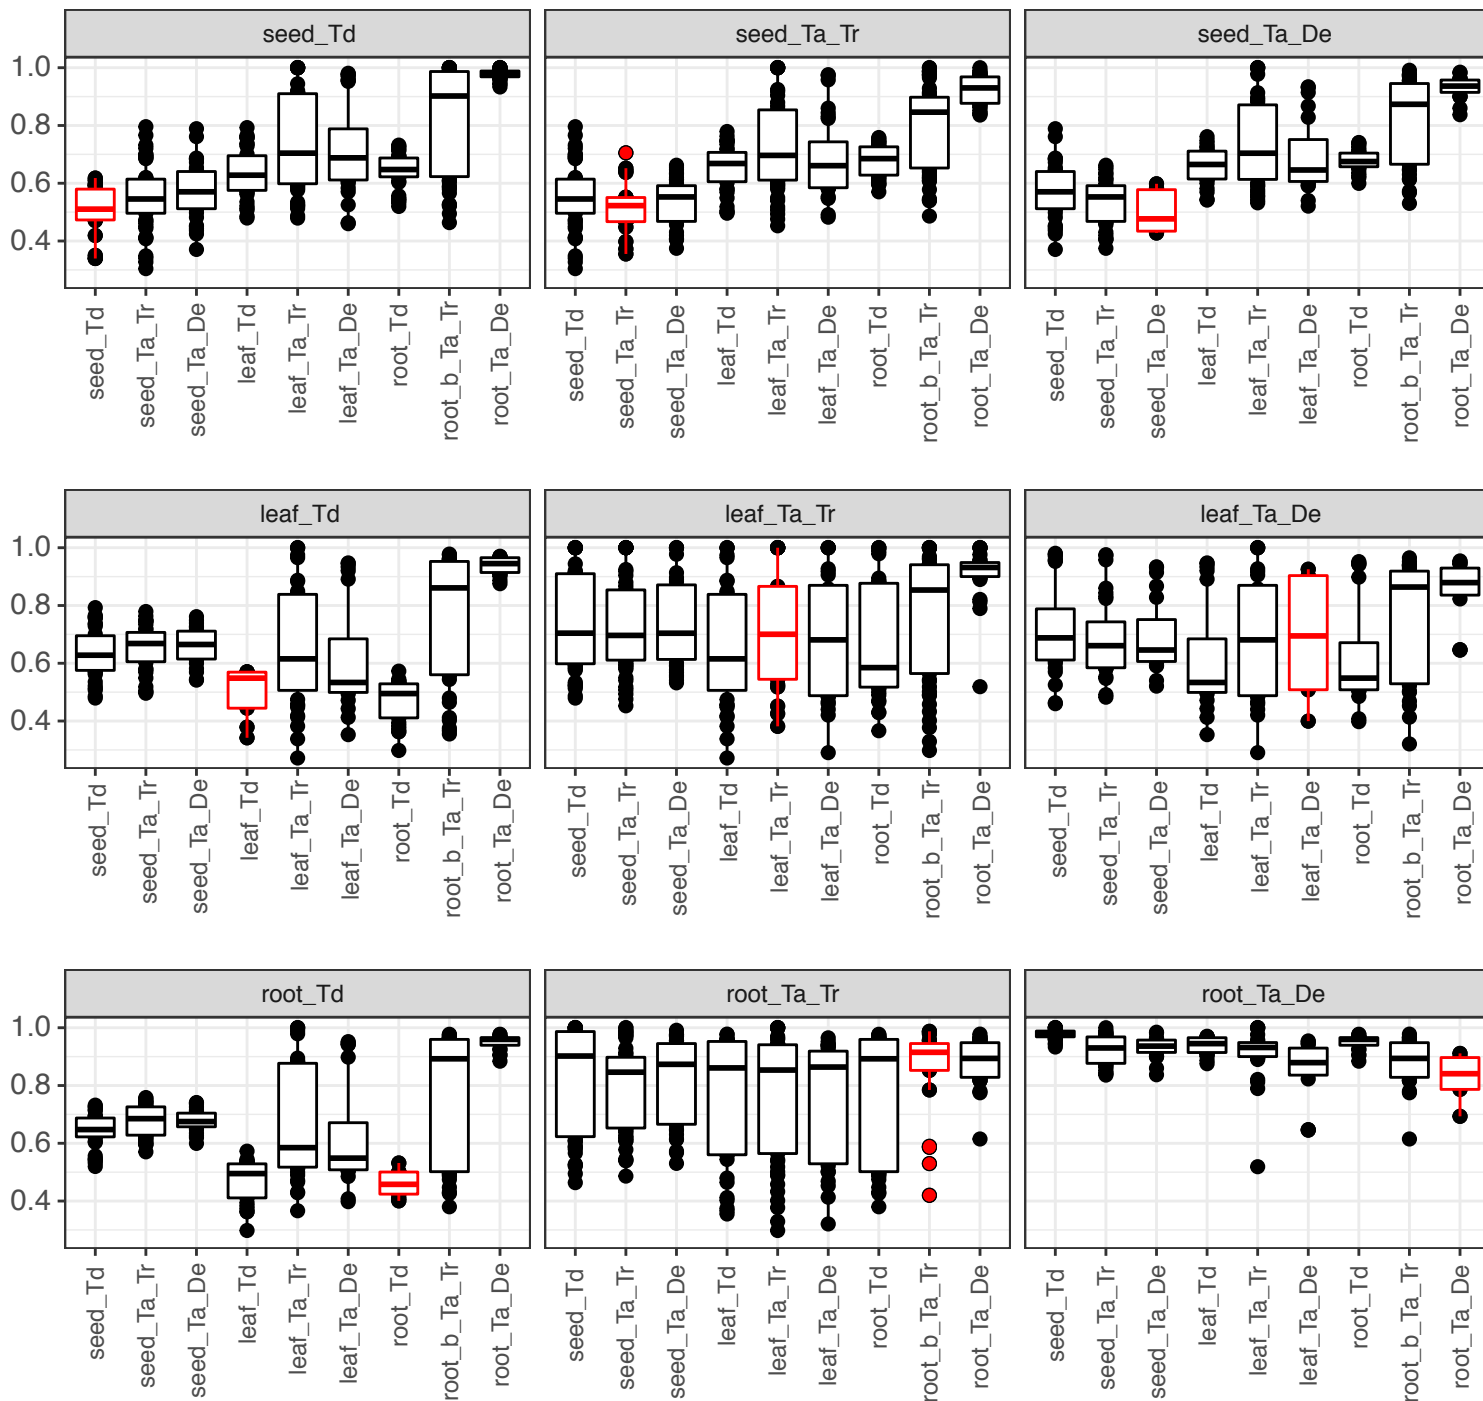

Pairwise distance

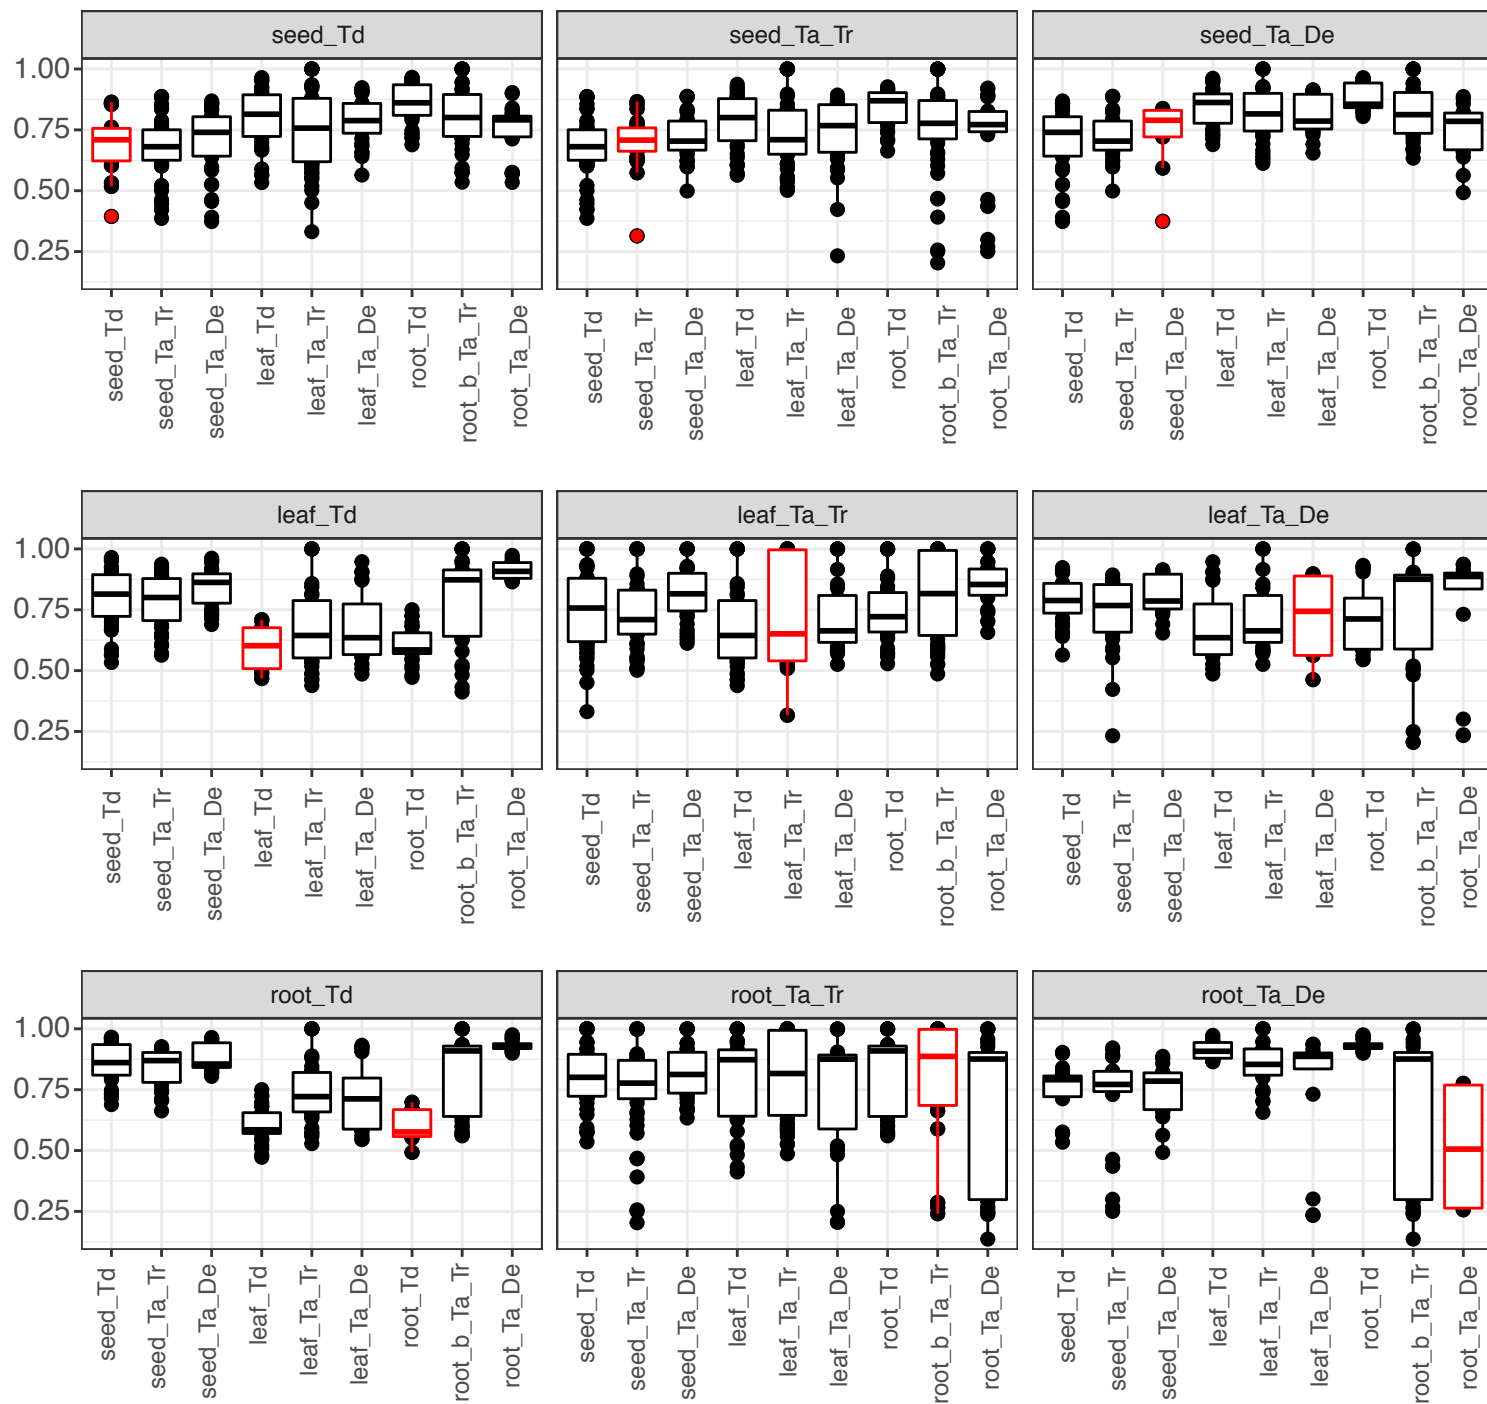

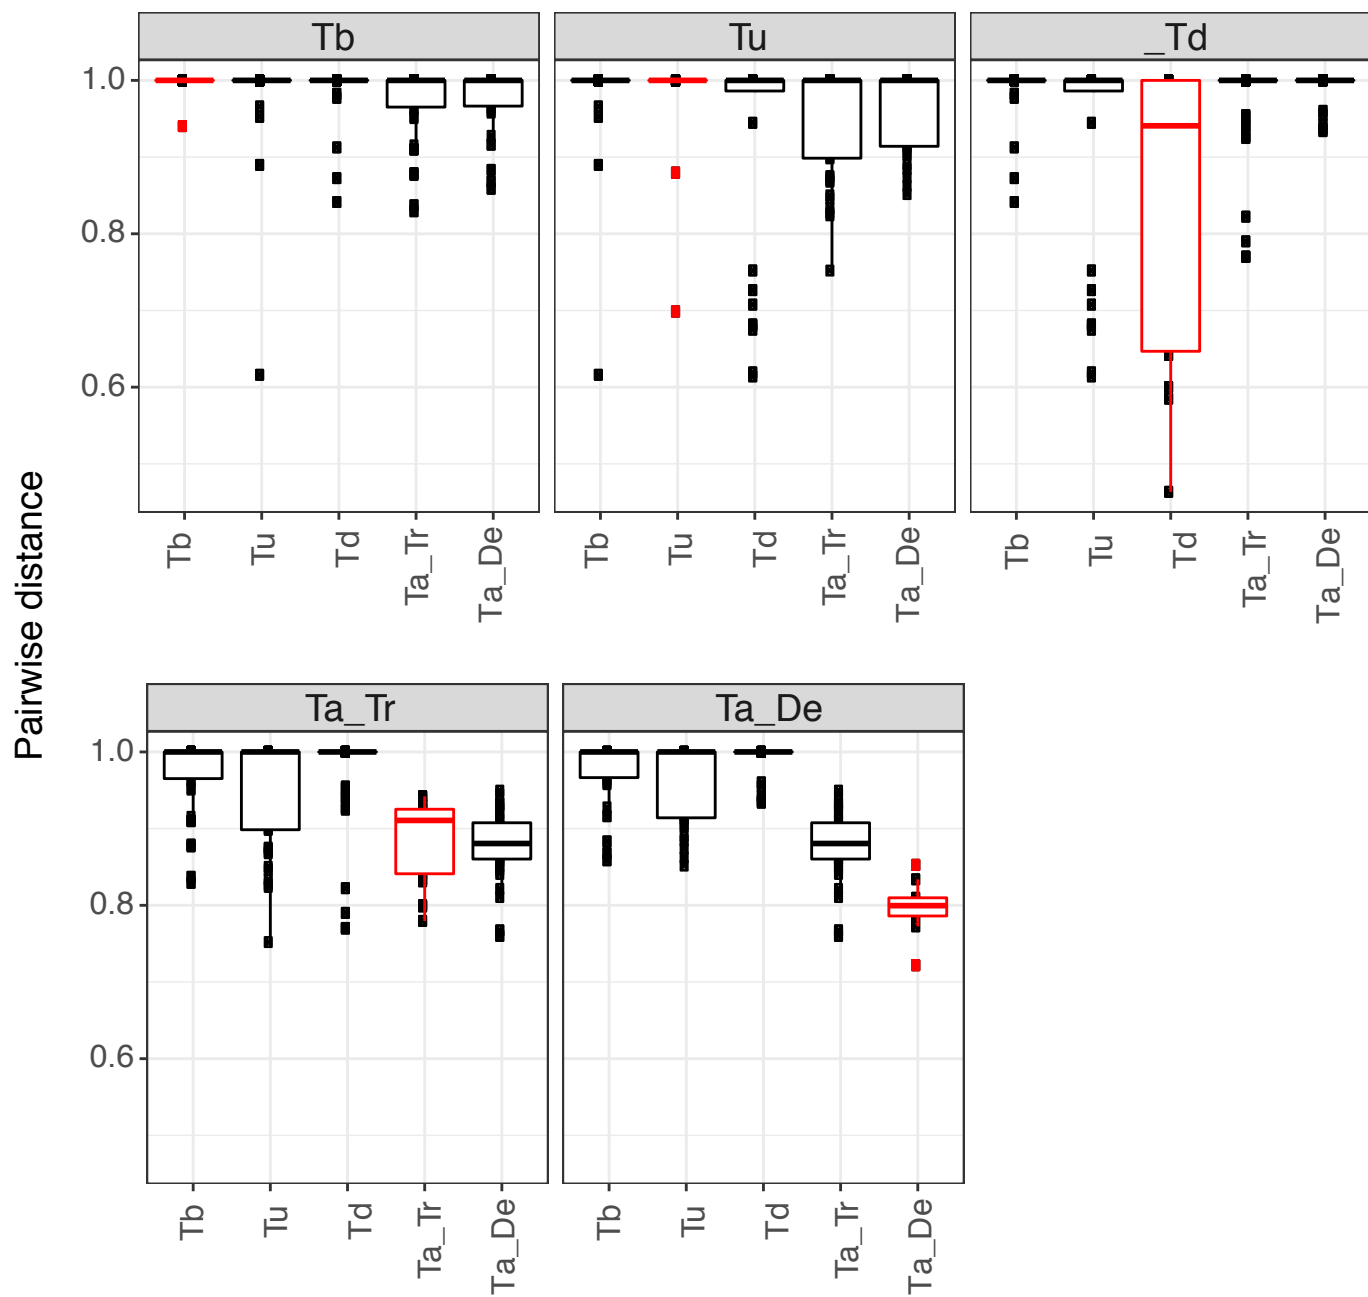

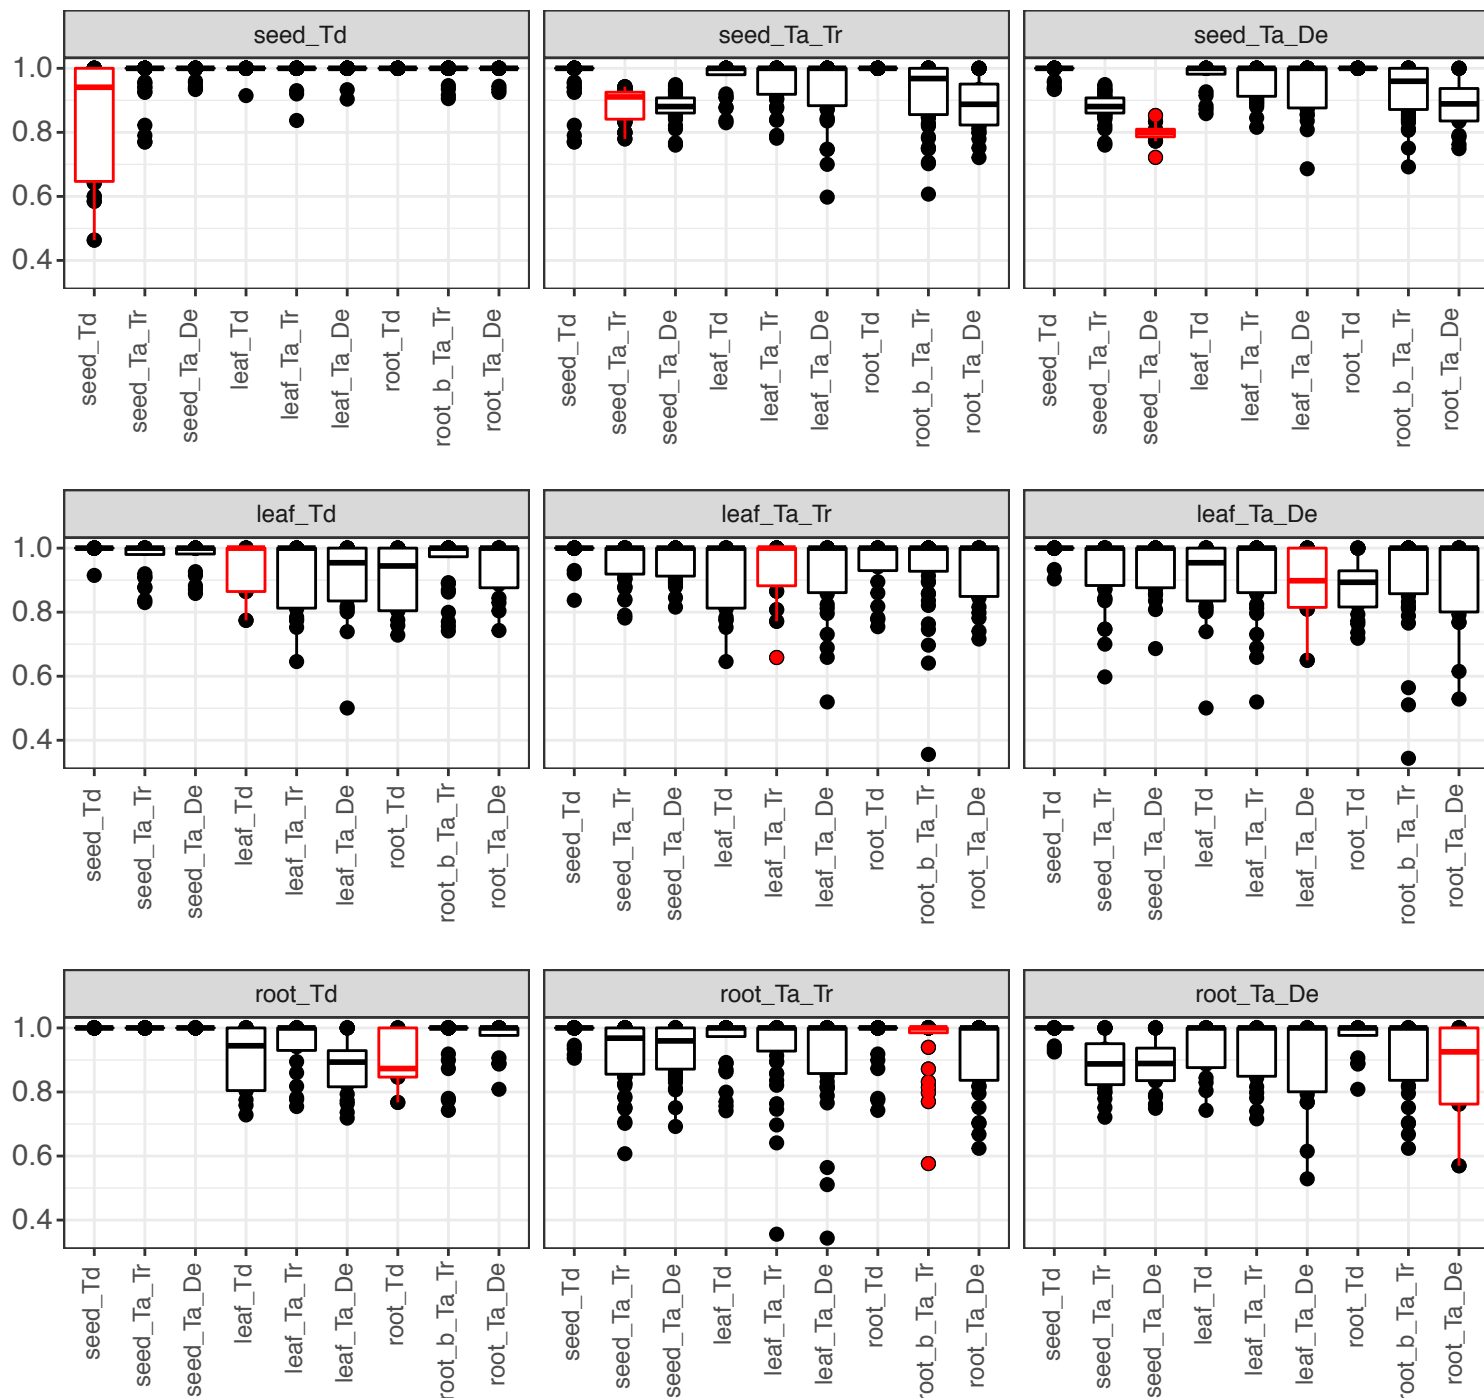

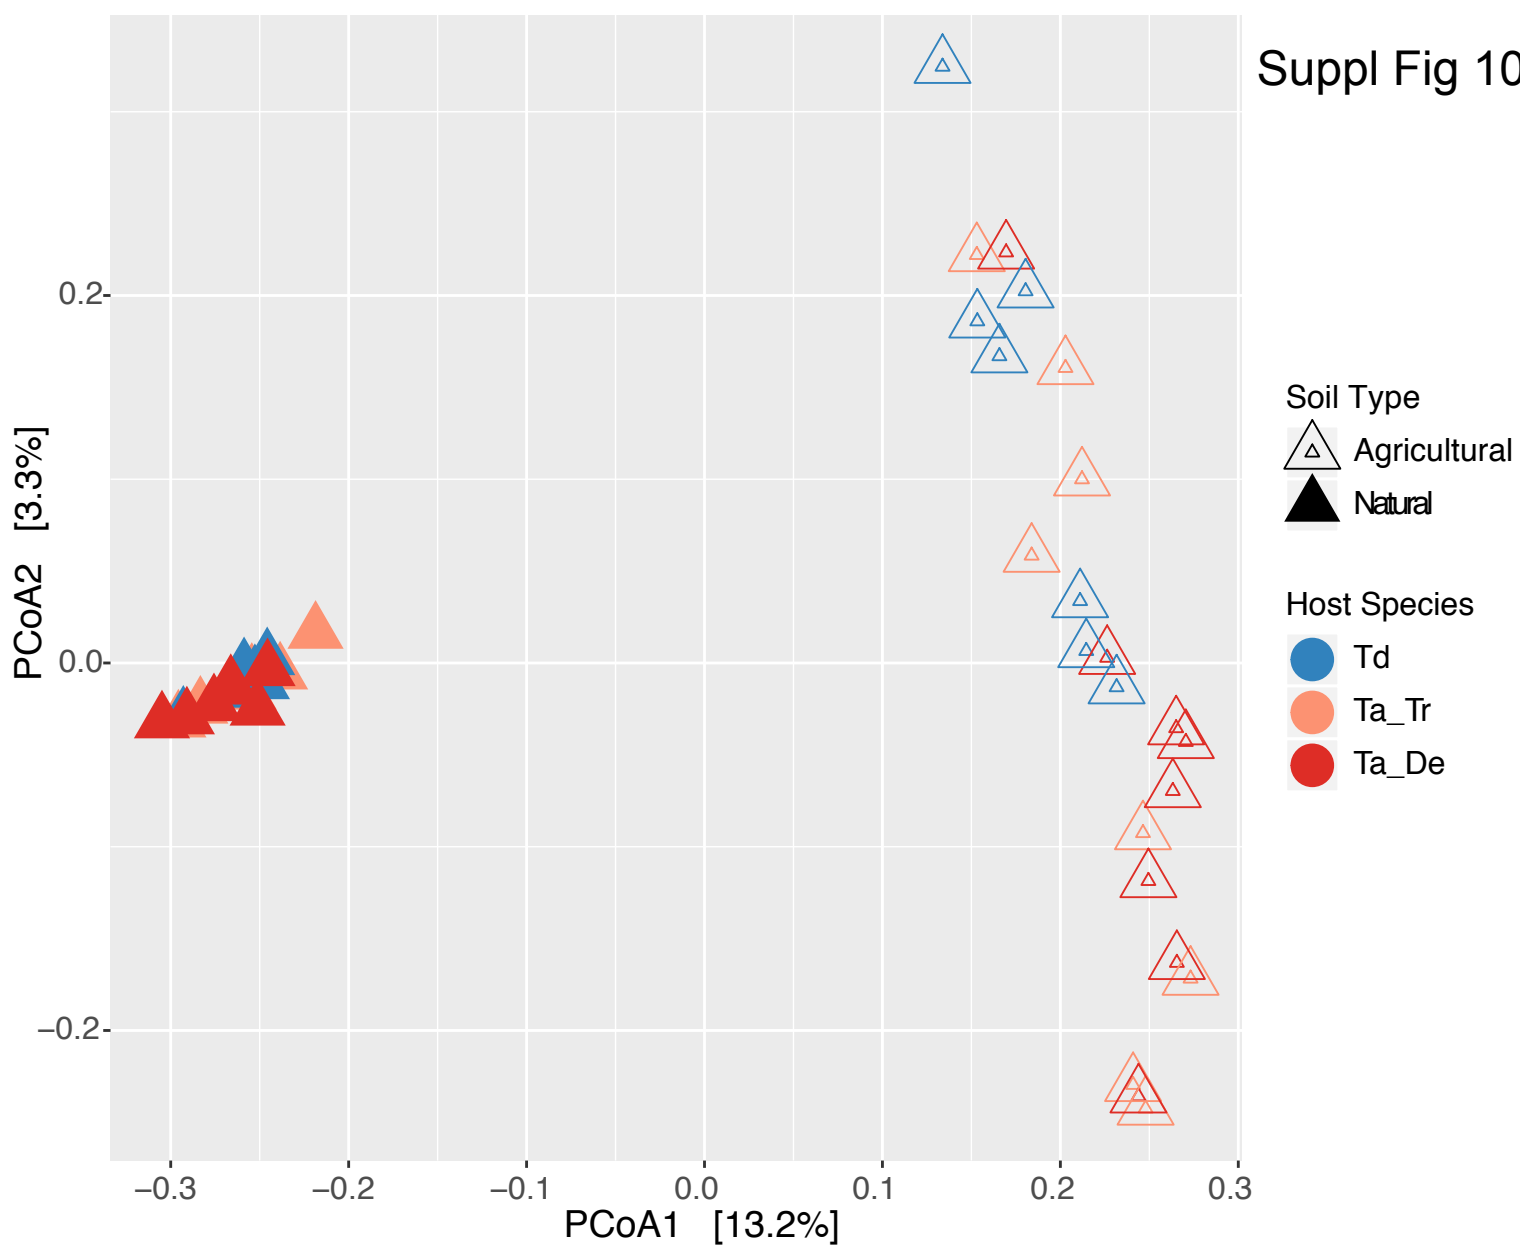

**A**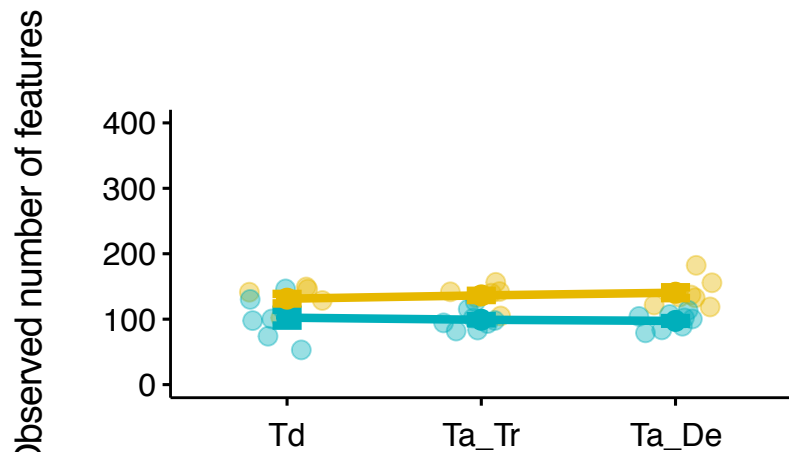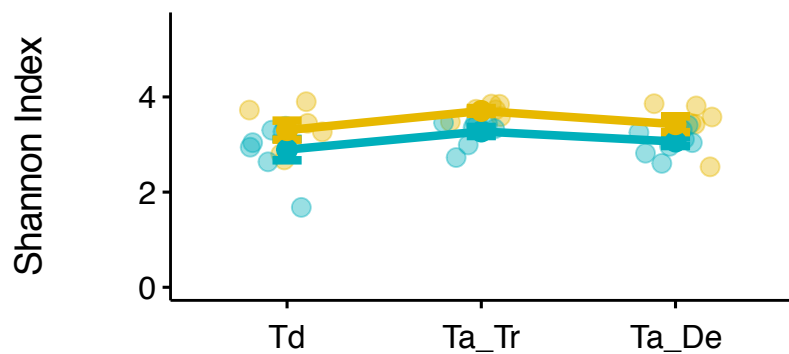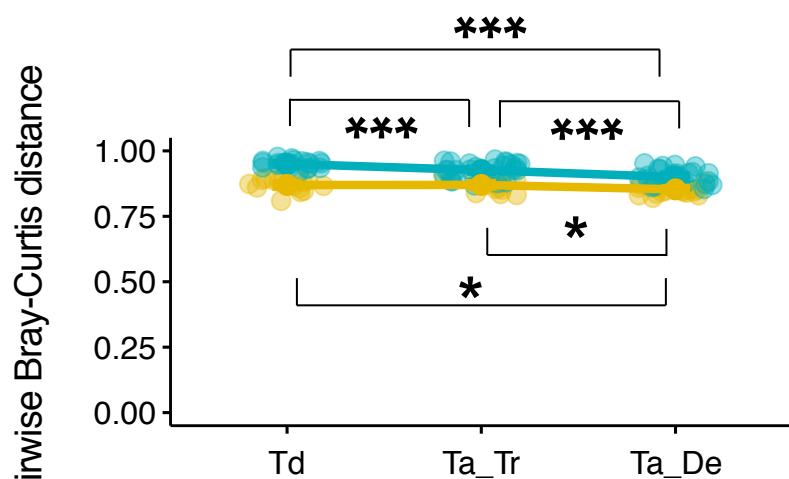

Host Species

**B**

Suppl Fig 11

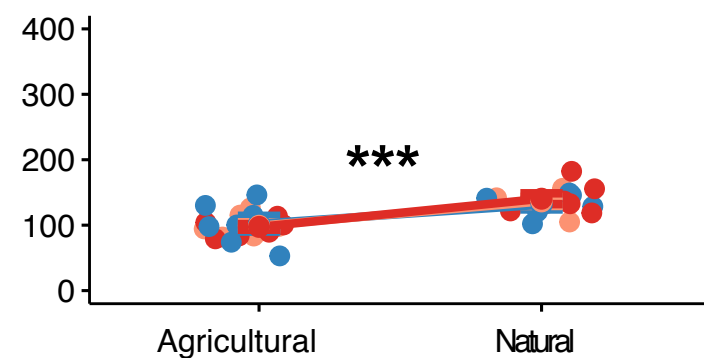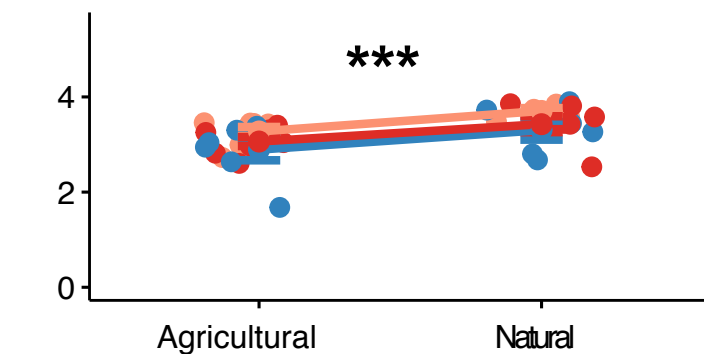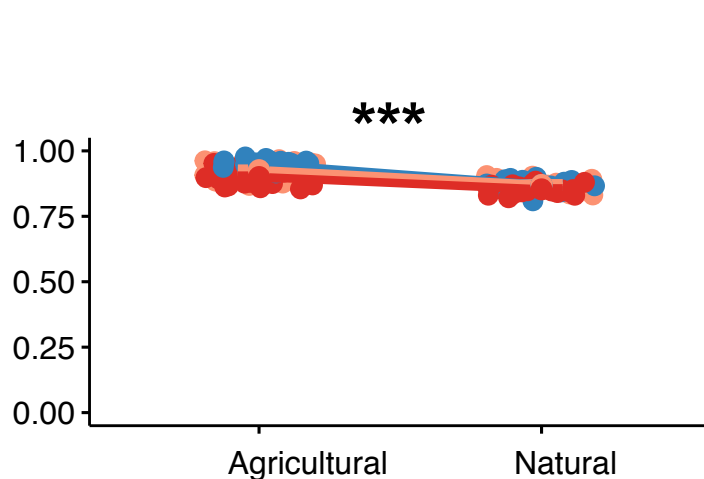

Soil Type

Soil Type ● Agricultural ● Natural

Host Species ● Td ● Ta\_Tr ● Ta\_De

## A) LEAVES

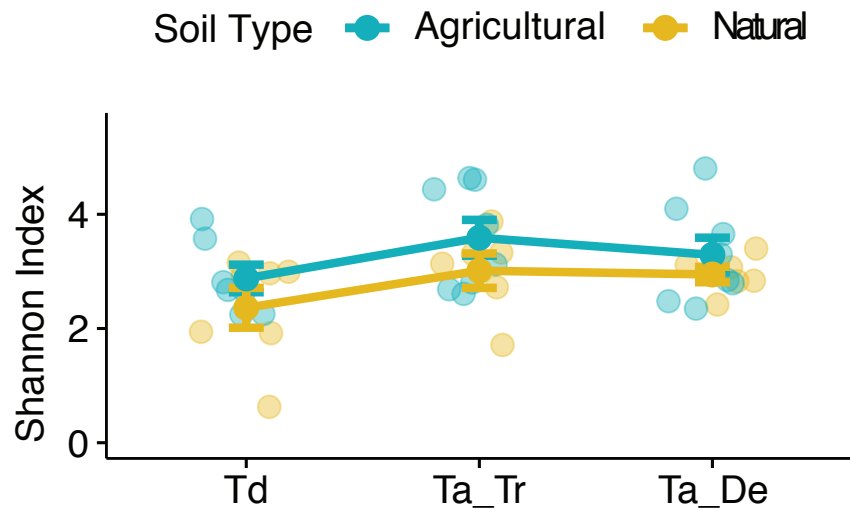

## Suppl Fig 12

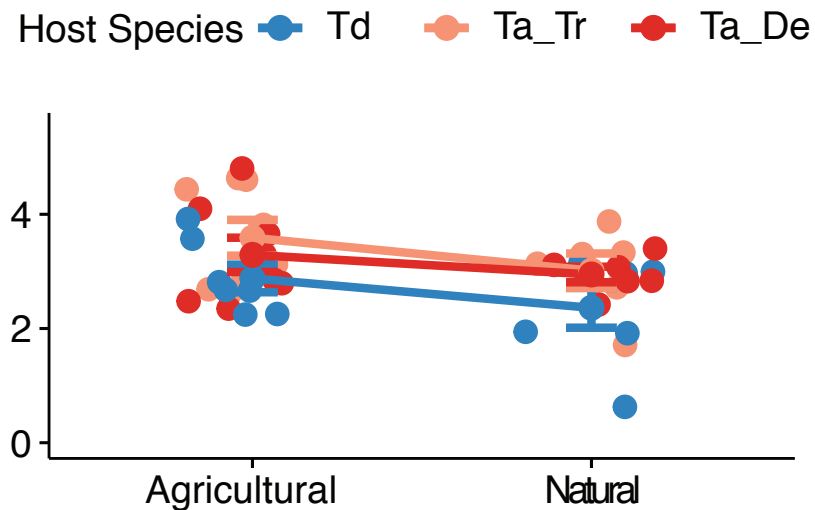

## B) ROOTS

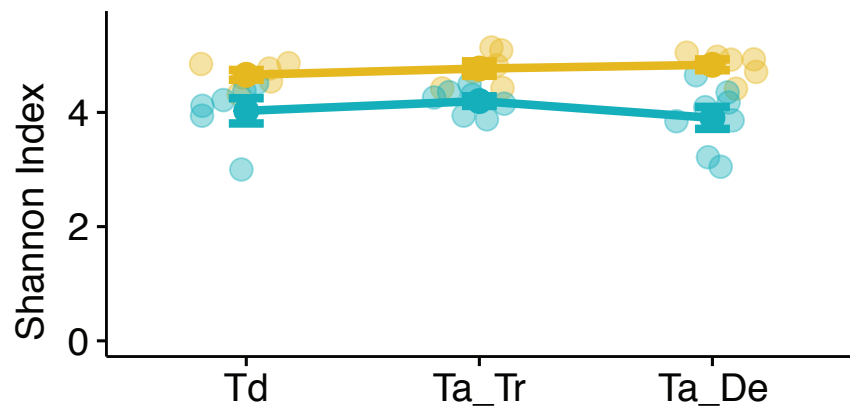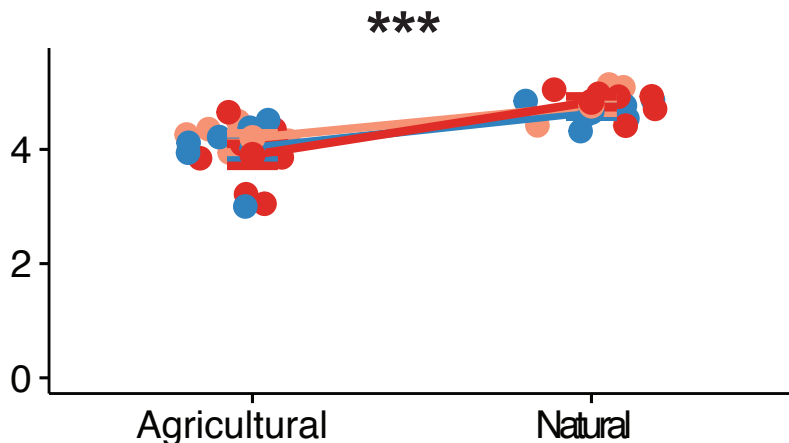



**A**

|                                     | Leaf |       |       | Root |       |       | Soil         |           |
|-------------------------------------|------|-------|-------|------|-------|-------|--------------|-----------|
|                                     | Td   | Ta_Tr | Ta_De | Td   | Ta_Tr | Ta_De | natural soil | agr. soil |
| Proteobacteria; Oxalobacteraceae    | 22.2 | 12.2  | 21.1  | 18.6 | 26.5  | 24.4  | 1            | 0.9       |
| Actinobacteria; Streptomyetaceae    | 0.3  | 2     | 3     | 32.6 | 27    | 30    | 0.7          | 10.3      |
| Proteobacteria; Comamonadaceae      | 7.4  | 19.9  | 16.1  | 8.3  | 9.8   | 8.8   | 2            | 3.5       |
| Proteobacteria; Rhizobiaceae        | 21.3 | 12.8  | 12.1  | 1    | 1.3   | 1.1   | 0.2          | 0         |
| Proteobacteria; Halomonadaceae      | 13.6 | 15.9  | 15.7  | 0    | 0.1   | 0     | 0            | 0         |
| Proteobacteria; Vibrionaceae        | 14.7 | 14    | 8.4   | 0    | 0.1   | 0     | 0            | 0         |
| Actinobacteria; Micromonosporaceae  | 0.1  | 0.5   | 0.6   | 5.6  | 5.9   | 7.7   | 3.4          | 1.9       |
| Actinobacteria; Nocardoidaceae      | 0.3  | 0.9   | 1.5   | 5.1  | 4.2   | 4     | 4            | 5.4       |
| Bacteroidetes; Flavobacteriaceae    | 0.2  | 0.4   | 0.2   | 5.9  | 4.6   | 4.7   | 0.3          | 2.1       |
| Proteobacteria; Xanthomonadaceae    | 1.3  | 1.6   | 1.3   | 3    | 2.7   | 2.7   | 1.5          | 5.9       |
| Proteobacteria; Burkholderiaceae    | 3.5  | 2     | 3.2   | 0.4  | 0.5   | 0.3   | 0.1          | 2.1       |
| Proteobacteria; Phyllobacteriaceae  | 3.5  | 1.6   | 3.1   | 0.3  | 0.3   | 0.4   | 0.2          | 0.5       |
| Proteobacteria; Pseudomonadaceae    | 2.7  | 1.7   | 1.6   | 0.6  | 0.6   | 0.5   | 0.2          | 0.9       |
| Actinobacteria; Geodermatophilaceae | 0    | 0.2   | 0.2   | 0.5  | 0.5   | 0.4   | 21.8         | 0.2       |
| Proteobacteria; Hyphomicrobiaceae   | 0.2  | 0.4   | 0.3   | 1.4  | 1.4   | 1.4   | 0.7          | 6.9       |
| Actinobacteria; Actinosynnemataceae | 0    | 0.1   | 0.1   | 2.5  | 1.8   | 1.9   | 1.6          | 0.4       |
| Proteobacteria; Caulobacteraceae    | 0.1  | 0.2   | 0.2   | 1.7  | 1.6   | 1.4   | 1            | 1.6       |
| Actinobacteria; Rubrobacteraceae    | 0    | 0.2   | 0.1   | 0.3  | 0.2   | 0.2   | 12.9         | 0.1       |
| Actinobacteria; Microbacteriaceae   | 0.1  | 0.2   | 0.3   | 1    | 0.8   | 0.9   | 1.4          | 1.5       |
| Proteobacteria; [Chromatiaceae]     | 1.4  | 1.5   | 0.6   | 0    | 0.1   | 0     | 0            | 0         |

**B**

|                                      | Agricultural |       |       | Natural |       |       |
|--------------------------------------|--------------|-------|-------|---------|-------|-------|
|                                      | Td           | Ta_Tr | Ta_De | Td      | Ta_Tr | Ta_De |
| Proteobacteria; Oxalobacteraceae     | 44.1         | 20.3  | 36.2  | 0.3     | 1.3   | 1     |
| Proteobacteria; Rhizobiaceae         | 0.1          | 0.1   | 0     | 42.5    | 29.6  | 28.2  |
| Proteobacteria; Halomonadaceae       | 11.2         | 10.5  | 8.1   | 16.1    | 23.2  | 25.8  |
| Proteobacteria; Comamonadaceae       | 10.4         | 21.3  | 17.1  | 4.4     | 18.1  | 14.8  |
| Proteobacteria; Vibrionaceae         | 8.1          | 16.3  | 4.5   | 21.2    | 11    | 13.6  |
| Proteobacteria; Burkholderiaceae     | 7            | 2.9   | 5.6   | 0       | 0.7   | 0.1   |
| Proteobacteria; Phyllobacteriaceae   | 0.1          | 0.1   | 0.2   | 7       | 3.7   | 6.9   |
| Proteobacteria; Pseudomonadaceae     | 4.4          | 2.6   | 2.4   | 1.1     | 0.4   | 0.4   |
| Actinobacteria; Streptomyetaceae     | 0.5          | 3.1   | 5.1   | 0       | 0.6   | 0.1   |
| Proteobacteria; Xanthomonadaceae     | 1.5          | 2.2   | 1.9   | 1       | 0.8   | 0.6   |
| Proteobacteria; [Chromatiaceae]      | 0.6          | 2.1   | 0.2   | 2.3     | 0.8   | 1.3   |
| Proteobacteria; Neisseriaceae        | 1.5          | 1.7   | 1.8   | 0.7     | 0.5   | 0.7   |
| Actinobacteria; Nocardoidaceae       | 0.5          | 1.2   | 2.4   | 0       | 0.6   | 0.3   |
| Actinobacteria; Propionibacteriaceae | 0.8          | 2.1   | 0.8   | 0.1     | 0.3   | 0.3   |
| Firmicutes; Streptococcaceae         | 0.8          | 1.1   | 0.7   | 0.6     | 0.3   | 0.5   |
| Proteobacteria; Enterobacteriaceae   | 0.5          | 1.1   | 0.5   | 0.7     | 0.4   | 0.5   |
| Proteobacteria; Methylobacteriaceae  | 0.5          | 0.9   | 0.5   | 0.1     | 0.7   | 0.5   |
| Actinobacteria; Micromonosporaceae   | 0.1          | 0.5   | 1     | 0.1     | 0.5   | 0.1   |
| Firmicutes; Staphylococcaceae        | 0.3          | 0.7   | 0.7   | 0       | 0.2   | 0.2   |
| Proteobacteria; Methylophilaceae     | 0.2          | 0.5   | 0.6   | 0.1     | 0.4   | 0.2   |

**C**

|                                       | Agricultural |       |       | Natural |       |       |
|---------------------------------------|--------------|-------|-------|---------|-------|-------|
|                                       | Td           | Ta_Tr | Ta_De | Td      | Ta_Tr | Ta_De |
| Actinobacteria; Streptomyetaceae      | 49.7         | 40.2  | 46.2  | 15.5    | 11.5  | 8.5   |
| Proteobacteria; Oxalobacteraceae      | 11.6         | 22    | 23.3  | 25.7    | 31.8  | 25.9  |
| Proteobacteria; Comamonadaceae        | 2.7          | 5.2   | 3.3   | 14      | 15    | 16.1  |
| Actinobacteria; Micromonosporaceae    | 3.6          | 3.5   | 3.3   | 7.6     | 8.8   | 13.6  |
| Bacteroidetes; Flavobacteriaceae      | 0.5          | 0.5   | 0.3   | 11.2    | 9.4   | 10.5  |
| Actinobacteria; Nocardoidaceae        | 8            | 6.2   | 5.4   | 2.2     | 1.8   | 2.1   |
| Proteobacteria; Xanthomonadaceae      | 4.1          | 3.6   | 3.1   | 2       | 1.6   | 2.2   |
| Actinobacteria; Actinosynnemataceae   | 1.4          | 0.9   | 0.5   | 3.7     | 2.9   | 3.9   |
| Proteobacteria; Caulobacteraceae      | 1.7          | 1.5   | 1     | 1.7     | 1.7   | 1.8   |
| Proteobacteria; Hyphomicrobiaceae     | 2            | 2     | 1.7   | 0.7     | 0.7   | 0.9   |
| Proteobacteria; Rhizobiaceae          | 0.6          | 1.2   | 0.8   | 1.5     | 1.4   | 1.5   |
| Actinobacteria; Thermomonosporaceae   | 1            | 1.2   | 1.1   | 1.1     | 1.3   | 0.8   |
| Actinobacteria; Microbacteriaceae     | 1            | 0.8   | 0.7   | 0.9     | 0.8   | 1.2   |
| Actinobacteria; Promicromonosporaceae | 0.4          | 0.5   | 0.3   | 1.7     | 0.9   | 1.4   |
| Chloroflexi; [Kouleothrixaceae]       | 0.4          | 0.4   | 0.4   | 0.7     | 1.4   | 1.1   |
| Actinobacteria; Pseudonocardiaceae    | 0.3          | 0.4   | 0.1   | 1.1     | 1.1   | 0.9   |
| Proteobacteria; Pseudomonadaceae      | 0.5          | 0.4   | 0.2   | 0.8     | 0.9   | 0.8   |
| Firmicutes; Paenibacillaceae          | 0.8          | 1.3   | 0.8   | 0       | 0     | 0     |
| Proteobacteria; Bradyrhizobiaceae     | 0.8          | 0.7   | 0.5   | 0.3     | 0.4   | 0.4   |
| Actinobacteria; Micrococcaceae        | 0.5          | 0.2   | 0.5   | 1       | 0.5   | 0.4   |

high  
|  
low

**ROOTS**

Suppl Fig 13

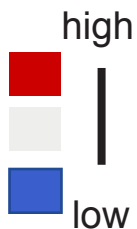

|                                      | Agricultural |         |         | Natural |         |         |
|--------------------------------------|--------------|---------|---------|---------|---------|---------|
| Ascomycota; Pseudeurotiaceae -       | 33.4         | 28.4    | 33.9    | 0       | 0.1     | 0.1     |
| Ascomycota; Phaeosphaeriaceae -      | 1.9          | 8.2     | 3.4     | 12.2    | 15.4    | 12.7    |
| Mortierellomycota; Mortierellaceae - | 14.8         | 3.9     | 2.2     | 7.2     | 13.8    | 7.3     |
| Ascomycota; Onygenales (IS) -        | 12.4         | 15      | 12.5    | 0       | 0.3     | 0.7     |
| Ascomycota; Helotiaceae -            | 11.4         | 13.7    | 10.8    | 0.7     | 0.2     | 1.1     |
| Ascomycota; Nectriaceae -            | 0.2          | 1.1     | 0.1     | 10.6    | 18.1    | 15      |
| Ascomycota; Pleosporaceae -          | 0            | 0       | 0       | 10.8    | 16.6    | 14.3    |
| Basidiomycota; Entolomataceae -      | 4.2          | 9.7     | 16.3    | 0       | 0       | 0       |
| Ascomycota; Lasiosphaeriaceae -      | 2.9          | 0.2     | 0.2     | 12.2    | 4.8     | 8.9     |
| Basidiomycota; Psathyrellaceae -     | 0            | 0       | 0       | 16.3    | 3.8     | 6.7     |
| Basidiomycota; Ceratobasidiaceae -   | 0            | 0       | 0       | 10.5    | 1.5     | 11.5    |
| Ascomycota; Myxotrichaceae -         | 6.4          | 3.1     | 3.5     | 0       | 0       | 0       |
| Ascomycota; Chaetomiaceae -          | 0.2          | 0.1     | 0       | 7.4     | 3       | 3.1     |
| Ascomycota; Cephalothecaceae -       | 2.5          | 3.8     | 3.5     | 0.1     | 0.4     | 0.2     |
| Ascomycota; Helotiales (IS) -        | 2.7          | 3.4     | 2.6     | 0       | 0       | 0       |
| Ascomycota; Pyronemataceae -         | 0            | 0.3     | 0.5     | 1.8     | 4.1     | 3.5     |
| Ascomycota; Diatrypaceae -           | 0            | 0       | 0       | 2       | 5.1     | 2.4     |
| Basidiomycota; Stephanosporaceae -   | 0            | 0       | 0       | 2.3     | 4.8     | 1.6     |
| Ascomycota; Myrmecridiaceae -        | 0.9          | 3.7     | 1.5     | 0       | 0       | 0       |
| Ascomycota; Aspergillaceae -         | 1.4          | 1.7     | 1.5     | 0.4     | 0.5     | 0.4     |
|                                      | Td -         | Ta_Tr - | Ta_De - | Td -    | Ta_Tr - | Ta_De - |

Suppl Fig 14
